# Supplementary material for: Mouse models of COVID-19 recapitulate inflammatory pathways rather than gene expression
Source: PubMed Central journal article supplement (PMC9536645; doi:10.1371/journal.ppat.1010867), 2022-09-26
Supplement: ppat.1010867.s007.pdf [file ppat.1010867.s007.pdf]

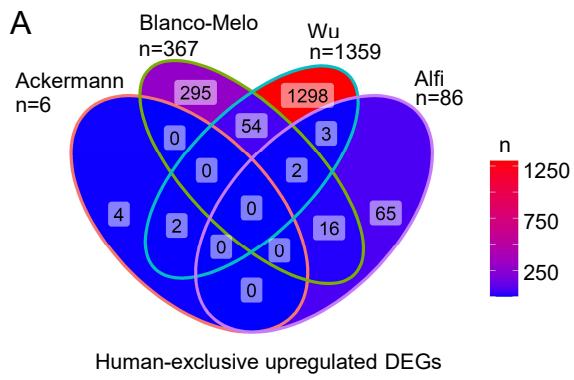

**B**

| Upstream Regulator | Molecule Type | Activation z-score | p-value of overlap |
|--------------------|---------------|--------------------|--------------------|
| IL4                | cytokine      | 7.563              | 0.0441             |
| IL5                | cytokine      | 5.885              | 1.49E-08           |
| CD40LG             | cytokine      | 4.145              | 0.0157             |
| TNF                | cytokine      | 4.022              | 0.0252             |
| IL15               | cytokine      | 3.671              | 7.43E-05           |
| IL1B               | cytokine      | 3.483              | 0.0186             |
| WNT1               | cytokine      | 2.942              | 0.0415             |
| IL2                | cytokine      | 2.759              | 4.12E-05           |
| IL3                | cytokine      | 2.557              | 3.4E-09            |
| EPO                | cytokine      | 2.394              | 3.06E-06           |
| OSM                | cytokine      | 2.26               | 0.0235             |

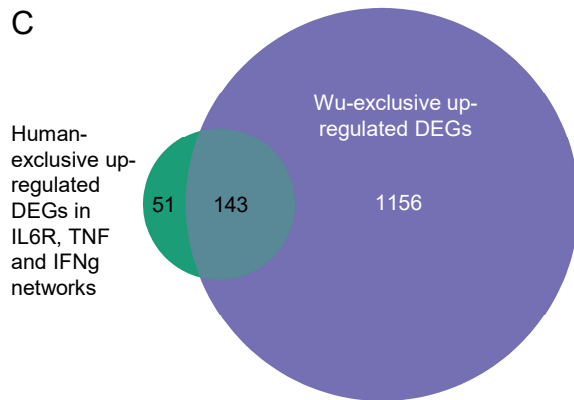

**D**

| Diseases or Functions Annotation | p-value  | Activation z-score |
|----------------------------------|----------|--------------------|
| Cell survival                    | 1.66E-23 | 5.32               |
| Organismal death                 | 6.18E-22 | -7.348             |
