# Supplementary material for: Mouse models of COVID-19 recapitulate inflammatory pathways rather than gene expression
Source: PubMed Central journal article supplement (PMC9536645; doi:10.1371/journal.ppat.1010867), 2022-09-26

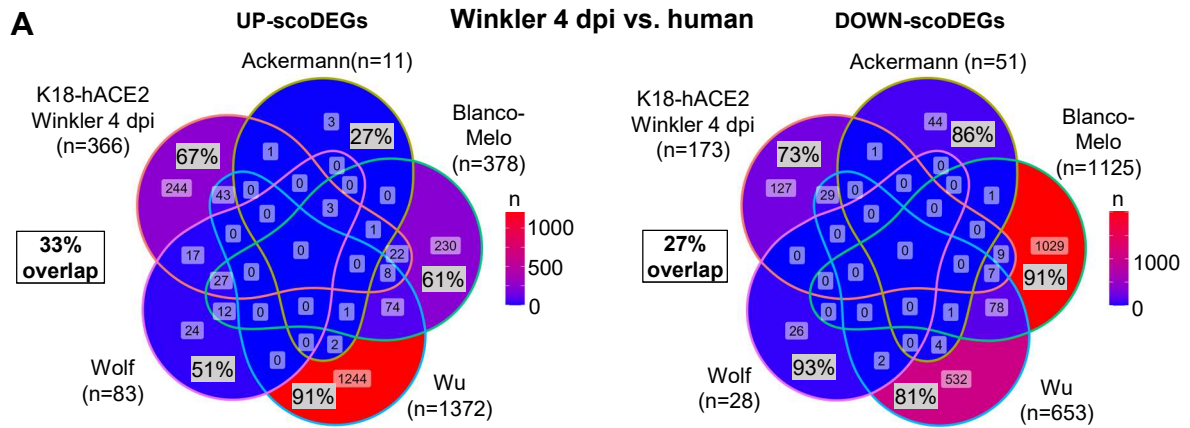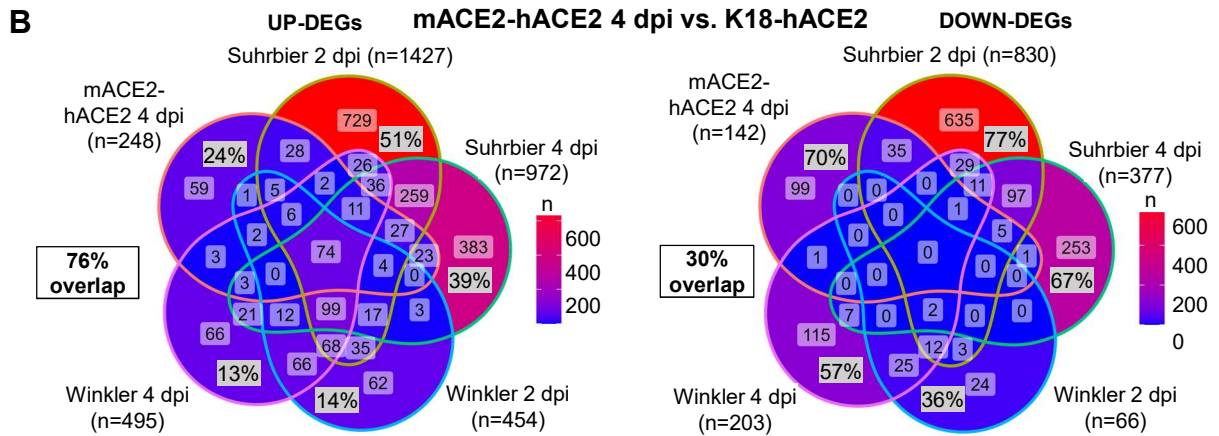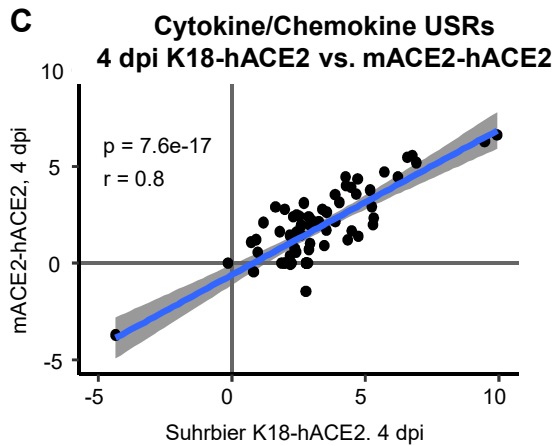

Supplement: ppat.1010867.s009.pdf [file ppat.1010867.s009.pdf]
