# Supplementary material for: Mouse models of COVID-19 recapitulate inflammatory pathways rather than gene expression
Source: PLOS journal article supplement (doi:10.1371/journal.ppat.1010867), 2022-09-26

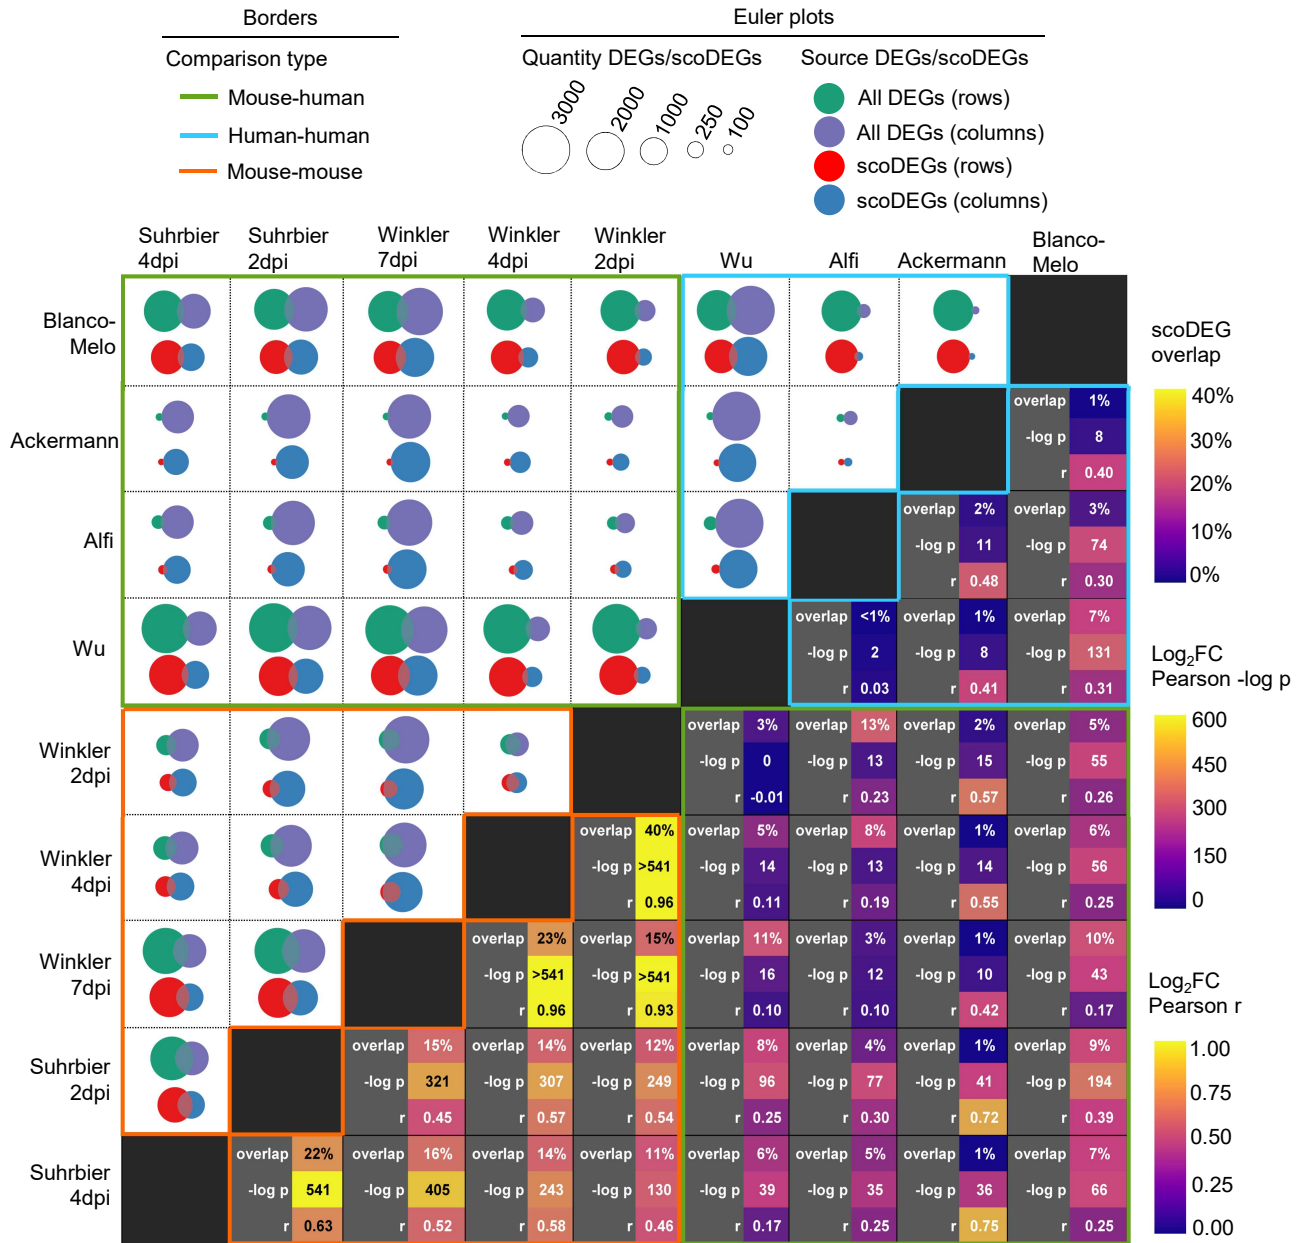

Supplement: S2 (10.1371/journal.ppat.1010867.s002) [file journal.ppat.1010867.s002]
