# Supplementary material for: Mouse models of COVID-19 recapitulate inflammatory pathways rather than gene expression
Source: PLoS Pathog. 2022 Sep 26;18(9):e1010867. doi: 10.1371/journal.ppat.1010867 (PMC9536645; doi:10.1371/journal.ppat.1010867)
Supplement: S10 File — (XLSX) [file ppat.1010867.s020.xlsx]

## Sheet: S10 File, sheet A
ET26 -2dpi - DEGs	ENSEMBL ID	HUGO ID	logFC	logCPM	F	PValue	FDR	Ms1day2	Ms2day2	Ms3day2	Ms4day2	Ms1naive	Ms2naive	Ms3naive
	ENSMUSG00000002325.16	Irf9	0.924499	6.51995	32.6533	2.91303e-05	0.0326229	2608	1087	1866	2781	1087	1195	1427
Differentially expressed genes (EdgeR, FDR<0.05) from lungs of mACE2-hACE2 C57BL/6J mice 2 days after infection with SARS-CoV-2 compared to control group	ENSMUSG00000011171.12	Vipr2	-0.952868	4.1747	30.8724	3.97674e-05	0.0326229	276	146	303	316	681	524	522
	ENSMUSG00000020038.11	Cry1	1.01264	3.75165	54.3631	1.35901e-06	0.019451	266	199	337	417	169	157	192
	ENSMUSG00000022584.15	Ly6c2	1.70863	5.23193	31.5425	3.53223e-05	0.0326229	1201	908	710	1201	294	370	431
	ENSMUSG00000025511.16	Tspan4	1.1505	6.46822	48.4394	2.81624e-06	0.019451	1796	1646	1894	2283	901	1127	1015
	ENSMUSG00000026971.16	Itgb6	-0.987915	5.47004	34.7489	2.04954e-05	0.0289396	786	310	551	784	1440	1291	1361
	ENSMUSG00000029155.17	Spata18	0.835397	3.96787	33.517	2.51543e-05	0.032558	418	194	329	404	255	191	202
	ENSMUSG00000030107.11	Usp18	1.59907	5.52043	30.9807	3.90081e-05	0.0326229	1219	422	553	1569	370	295	370
	ENSMUSG00000031016.10	Wee1	0.790808	4.25747	31.1888	3.75945e-05	0.0326229	369	210	407	513	226	262	247
	ENSMUSG00000032024.11	Clmp	-1.0723	3.45181	37.7407	1.27208e-05	0.0252524	160	100	142	149	337	362	316
	ENSMUSG00000032515.9	Csrnp1	1.22423	5.82759	27.7453	7.08329e-05	0.0478338	902	761	1584	1353	445	580	664
	ENSMUSG00000033355.7	Rtp4	1.6397	5.67049	29.1406	5.44697e-05	0.0384556	1754	626	911	1697	417	409	524
	ENSMUSG00000035692.8	Isg15	2.61039	5.62823	31.8578	3.34267e-05	0.0326229	1301	344	370	1497	133	161	180
	ENSMUSG00000037379.8	Spon2	-1.83621	3.74754	46.2385	3.75696e-06	0.019451	147	112	124	133	638	514	496
	ENSMUSG00000041827.16	Oasl1	2.28699	3.48729	30.2949	4.41062e-05	0.0334867	302	101	180	668	53	78	75
	ENSMUSG00000042487.7	Leo1	-0.870533	3.35273	37.6801	1.28408e-05	0.0252524	159	80	192	156	343	282	295
	ENSMUSG00000052776.11	Oas1a	1.86453	4.87027	43.7107	5.30005e-06	0.0205801	680	273	417	897	164	147	209
	ENSMUSG00000055116.9	Arntl	-1.77315	3.02762	36.1797	1.62583e-05	0.0252524	92	85	112	70	503	283	329
	ENSMUSG00000066861.15	Oas1g	1.97998	3.07859	30.8527	3.9907e-05	0.0326229	161	48	78	206	26	38	39
	ENSMUSG00000072620.4	Slfn2	1.13286	5.91946	30.1501	4.52756e-05	0.0334867	1402	1018	1461	1775	611	749	873
	ENSMUSG00000073489.7	Ifi204	1.68536	4.06468	36.6595	1.50654e-05	0.0252524	401	203	424	841	146	177	156
	ENSMUSG00000106957.2	Gm43085	-0.910042	7.01579	40.8328	7.9887e-06	0.0248161	1615	1230	1811	2253	4275	3716	3317
	ENSMUSG00000109904.2	Gm45819	1.45854	2.06166	37.2724	1.36818e-05	0.0252524	90	52	93	125	35	30	46

## Sheet: S10 File, sheet B
ET26 - 2dpi - orthoDEGs	HUGO ID	logFC	FDR
	IRF9	0.924499	0.0326229
Differentially expressed genes were filtered to retain only those with a human orthologue in the Ensembl database	VIPR2	-0.952868	0.0326229
	CRY1	1.01264	0.019451
	TSPAN4	1.1505	0.019451
	ITGB6	-0.987915	0.0289396
	SPATA18	0.835397	0.032558
	USP18	1.59907	0.0326229
	WEE1	0.790808	0.0326229
	CLMP	-1.0723	0.0252524
	CSRNP1	1.22423	0.0478338
	RTP4	1.6397	0.0384556
	ISG15	2.61039	0.0326229
	SPON2	-1.83621	0.019451
	OASL1	2.28699	0.0334867
	LEO1	-0.870533	0.0252524
	OAS1A	1.86453	0.0205801
	ARNTL	-1.77315	0.0252524
	OAS1G	1.97998	0.0326229
	SLFN2	1.13286	0.0334867
	IFI204	1.68536	0.0252524

## Sheet: S10 File, sheet C
ET26 - 2dpi - scoDEGs	HUGO ID	logFC	FDR
	IRF9	0.924499	0.0326229
Differentially expressed genes were filtered to retain only those with a single-copy human orthologue in the Ensembl database	VIPR2	-0.952868	0.0326229
	CRY1	1.01264	0.019451
	TSPAN4	1.1505	0.019451
	ITGB6	-0.987915	0.0289396
	SPATA18	0.835397	0.032558
	WEE1	0.790808	0.0326229
	CLMP	-1.0723	0.0252524
	CSRNP1	1.22423	0.0478338
	RTP4	1.6397	0.0384556
	ISG15	2.61039	0.0326229
	SPON2	-1.83621	0.019451
	OASL1	2.28699	0.0334867
	LEO1	-0.870533	0.0252524
	ARNTL	-1.77315	0.0252524

## Sheet: S10 File, sheet D
ET26 - 4dpi - DEGs	ENSEMBL ID	HUGO ID	logFC	logCPM	F	PValue	FDR	Ms1day2	Ms2day2	Ms3day2	Ms4day2	Ms1naive	Ms2naive	Ms3naive
	ENSMUSG00000000204.17	Slfn4	3.34954	5.04248	24.7117	0.000129377	0.0173367	1637	2269	605	390	96	123	187
Differentially expressed genes (EdgeR, FDR<0.05) from lungs of mACE2-hACE2 C57BL/6J mice 4 days after infection with SARS-CoV-2 compared to control group	ENSMUSG00000000276.12	Dgke	-0.66059	4.98097	28.9853	5.60619e-05	0.01075	480	433	638	478	975	797	797
	ENSMUSG00000000416.17	Cttnbp2	-1.04474	2.85425	20.512	0.000323405	0.0267188	84	101	128	117	293	195	224
	ENSMUSG00000000673.10	Haao	-1.39166	2.34309	16.3299	0.000906184	0.0436875	62	41	81	70	164	187	178
	ENSMUSG00000001123.16	Lgals9	1.34165	7.18437	25.293	0.000114865	0.0159293	3999	4267	4779	5398	1863	1941	2033
	ENSMUSG00000001131.12	Timp1	1.79978	3.48418	22.7942	0.000194051	0.0209306	332	374	416	356	79	152	109
	ENSMUSG00000001228.15	Uhrf1	1.47905	3.23565	29.0196	5.57054e-05	0.01075	223	228	325	294	108	100	98
	ENSMUSG00000001403.14	Ube2c	2.18614	2.61946	20.1577	0.000351149	0.0281137	193	147	145	153	24	46	43
	ENSMUSG00000001467.6	Cyp51	0.722555	5.44265	22.6228	0.000201416	0.0212816	1075	1054	1203	1026	702	675	749
	ENSMUSG00000001473.8	Tubb6	0.782125	4.93893	15.9136	0.00101185	0.0455503	692	673	808	687	379	481	473
	ENSMUSG00000002297.17	Dbf4	0.693134	2.90799	15.6465	0.0010869	0.0465693	138	127	183	171	113	96	97
	ENSMUSG00000002325.16	Irf9	1.21936	6.51995	55.7442	1.15701e-06	0.00149755	2361	2431	3036	3000	1087	1195	1427
	ENSMUSG00000003585.14	Sec14l2	0.793869	4.39414	25.4025	0.000112341	0.0158026	541	511	496	418	282	310	327
	ENSMUSG00000003617.17	Cp	0.686506	8.21074	16.5892	0.000846678	0.0426968	7574	7585	8554	7865	5756	5224	4862
	ENSMUSG00000003779.17	Kif20a	1.42365	2.52628	26.5554	8.92356e-05	0.0137623	145	163	153	178	60	65	67
	ENSMUSG00000004460.18	Dnajb11	0.512258	6.19323	15.2311	0.00121649	0.0491061	1587	1636	1861	1795	1293	1295	1291
	ENSMUSG00000005667.9	Mthfd2	1.0383	2.87788	21.7045	0.000246645	0.0233122	161	196	195	198	103	81	110
	ENSMUSG00000005800.4	Mmp8	3.84116	3.85935	15.4787	0.00113729	0.047231	1386	1429	243	72	71	60	58
	ENSMUSG00000005947.12	Itgae	-0.844316	2.59103	23.6873	0.000160255	0.0191468	60	58	89	91	161	136	130
	ENSMUSG00000006344.18	Ggt5	0.811222	3.98124	25.2252	0.00011646	0.0160075	443	512	460	425	316	303	235
	ENSMUSG00000006398.16	Cdc20	1.03819	2.91946	17.9631	0.000596359	0.0366113	177	175	196	271	114	94	112
	ENSMUSG00000006418.18	Rnf114	0.492528	6.90186	16.2292	0.000930539	0.0441627	2292	2396	2922	3246	2048	2082	2047
	ENSMUSG00000006456.11	Rbm14	0.567984	5.309	18.9575	0.000467075	0.0328121	876	881	978	948	565	702	727
	ENSMUSG00000006494.12	Pdk1	-0.605599	5.19047	22.0789	0.000226955	0.022507	464	354	658	581	932	856	702
	ENSMUSG00000007659.19	Bcl2l1	0.982035	7.12674	15.2808	0.00120011	0.048796	4203	4005	3431	3039	2133	1887	2052
	ENSMUSG00000009185.3	Ccl8	1.93118	3.029	19.3189	0.000428165	0.0316679	216	193	231	281	52	73	68
	ENSMUSG00000009772.16	Nuak2	0.558776	4.65877	18.2065	0.000561346	0.0352989	563	575	590	532	386	435	418
	ENSMUSG00000010142.13	Tnfrsf13b	-0.823145	3.36705	19.8676	0.000375871	0.0293826	128	96	198	164	282	300	239
	ENSMUSG00000010358.14	Ifi35	0.865796	6.10001	23.8453	0.000154993	0.0188074	1465	1468	1874	2107	1017	996	1020
	ENSMUSG00000012443.5	Kif11	1.08077	2.75651	22.2719	0.000217497	0.0219361	138	148	202	202	76	85	98
	ENSMUSG00000015656.18	Hspa8	1.46888	10.5382	26.2613	9.45759e-05	0.0141348	36682	45164	33525	43796	11517	15502	19476
	ENSMUSG00000015839.7	Nfe2l2	0.588125	7.63574	33.0596	2.71781e-05	0.007837	4281	4275	4966	4000	3013	3050	3310
	ENSMUSG00000015947.11	Fcgr1	1.92986	3.07427	32.3313	3.07898e-05	0.00838996	227	198	263	361	76	47	96
	ENSMUSG00000016024.10	Lbp	0.552358	6.1535	18.6114	0.000508106	0.0333266	1585	1568	1898	1707	1120	1378	1199
	ENSMUSG00000017146.13	Brca1	1.14124	1.42506	25.7351	0.000105049	0.0153927	54	71	75	83	42	25	36
	ENSMUSG00000017428.17	Psmd11	0.312392	6.01973	15.5207	0.00112442	0.047231	1352	1337	1617	1465	1294	1261	1182
	ENSMUSG00000017716.16	Birc5	1.56093	2.50968	51.3011	1.96455e-06	0.00234719	127	126	134	171	56	40	56
	ENSMUSG00000017830.16	Dhx58	1.87196	4.34185	29.0668	5.52198e-05	0.01075	620	647	802	1022	236	214	225
	ENSMUSG00000018362.15	Kpna2	0.746685	5.56113	22.9108	0.000189214	0.0208441	962	832	1223	1122	584	663	716
	ENSMUSG00000018500.3	Adora2b	0.85429	3.60408	17.4762	0.000674045	0.0388221	322	279	311	259	179	177	168
	ENSMUSG00000018924.7	Alox15	-2.06759	1.5338	16.4207	0.00088483	0.0432497	34	8	40	34	106	168	110
	ENSMUSG00000019122.9	Ccl9	1.26773	4.33061	17.3087	0.00070335	0.0388221	683	517	542	463	271	247	228
	ENSMUSG00000019942.14	Cdk1	1.7819	2.81858	31.5115	3.55156e-05	0.00923313	181	189	235	282	60	59	86
	ENSMUSG00000019960.9	Dusp6	0.712776	6.60679	20.5205	0.000322771	0.0267188	2417	2526	2981	1912	1803	1409	1629
	ENSMUSG00000020038.11	Cry1	0.544892	3.75165	16.0441	0.000977285	0.045311	211	218	274	242	169	157	192
	ENSMUSG00000020264.6	Slc36a2	-0.697471	5.37912	20.4339	0.000329303	0.0269763	528	502	746	791	1264	1237	829
	ENSMUSG00000020359.14	Phykpl	-0.62324	3.79953	19.7546	0.00038602	0.0294904	183	176	264	219	403	319	315
	ENSMUSG00000020427.12	Igfbp3	-0.722103	6.53194	21.4002	0.000264078	0.023709	1389	1293	1681	1818	2614	2785	2754
	ENSMUSG00000020572.9	Nampt	0.584213	6.37177	30.6149	4.16401e-05	0.00965305	1737	1853	1943	2167	1387	1272	1475
	ENSMUSG00000020638.9	Cmpk2	1.59226	5.43068	22.3702	0.000212849	0.0217414	913	1257	1447	2085	436	508	558
	ENSMUSG00000020641.17	Rsad2	2.67277	4.60787	27.0788	8.05492e-05	0.0128237	553	1206	1015	1584	159	175	212
	ENSMUSG00000020651.9	Slc26a4	1.31146	2.55217	23.9177	0.000152646	0.0186795	202	281	269	177	98	91	113
	ENSMUSG00000020897.13	Aurkb	1.63124	1.88463	35.1826	1.90924e-05	0.00749776	78	97	119	119	33	33	40
	ENSMUSG00000020914.18	Top2a	1.57009	4.08314	29.0167	5.57355e-05	0.01075	403	495	542	555	171	167	200
	ENSMUSG00000021091.9	Serpina3n	1.55317	7.74343	18.0915	0.000577591	0.0360287	8253	10306	8919	4728	2976	3264	2725
	ENSMUSG00000021238.12	Aldh6a1	-0.500111	6.38704	18.2689	0.000552746	0.0350983	1237	1081	1553	1366	2300	2071	1578
	ENSMUSG00000021242.10	Npc2	1.17675	10.2353	15.7922	0.0010452	0.0460994	31935	27868	33935	29650	14973	14162	14817
	ENSMUSG00000021795.11	Sftpd	1.08798	9.8885	16.1006	0.000962738	0.0450135	25884	22097	25648	20808	11543	12289	12032
	ENSMUSG00000021886.8	Gpr65	0.839836	2.56814	20.838	0.000300046	0.0254662	160	143	130	151	93	81	91
	ENSMUSG00000021922.18	Itih4	1.47656	6.26711	82.983	8.10081e-08	0.000251644	2395	2635	3080	2535	956	1042	1070
	ENSMUSG00000022014.16	Epsti1	0.988788	3.7377	22.9106	0.000189223	0.0208441	271	294	363	451	179	171	204
	ENSMUSG00000022033.10	Pbk	1.55335	1.5022	17.6768	0.000640735	0.0381287	70	82	96	103	28	24	43
	ENSMUSG00000022126.7	Acod1	3.6437	0.653511	16.8111	0.000799228	0.0416564	75	128	26	13	2	3	11
	ENSMUSG00000022216.18	Psme1	0.74733	7.04372	18.4282	0.000531459	0.034337	2888	2502	3429	3891	1944	2006	2094
	ENSMUSG00000022385.12	Gtse1	1.54733	1.22714	25.5196	0.00010971	0.0157374	61	81	53	60	26	15	30
	ENSMUSG00000022391.17	Rangap1	0.454597	5.95129	19.7427	0.000387112	0.0294904	1347	1342	1559	1379	1033	1124	1142
	ENSMUSG00000022414.9	Tab1	-0.701652	4.42425	16.9034	0.000780393	0.0414733	284	241	330	355	590	529	461
	ENSMUSG00000022456.19	Septin3	-1.72538	2.34971	22.5184	0.000206055	0.0216127	37	34	43	58	162	157	138
	ENSMUSG00000022548.15	Apod	3.49151	5.55583	104.553	1.59518e-08	8.28786e-05	2559	1927	2788	3769	361	256	174
	ENSMUSG00000022584.15	Ly6c2	1.46268	5.23193	23.541	0.000165305	0.0194509	1018	704	743	1291	294	370	431
	ENSMUSG00000022586.12	Ly6i	4.07973	3.33502	100.366	2.1344e-08	8.28786e-05	571	475	524	867	35	28	52
	ENSMUSG00000022587.15	Ly6e	1.20933	10.682	30.7791	4.04346e-05	0.00960795	47943	42383	54215	57347	22118	23296	24483
	ENSMUSG00000022840.10	Adcy5	-0.576732	5.08054	15.9091	0.00101305	0.0455503	435	470	676	565	894	908	752
	ENSMUSG00000022876.19	Samsn1	0.757156	3.31191	22.4901	0.000207333	0.0216127	264	274	255	222	150	149	187
	ENSMUSG00000022906.16	Parp9	1.03888	5.89728	26.2576	9.46446e-05	0.0141348	1371	1504	1822	2068	853	860	918
	ENSMUSG00000022996.16	Wnt10b	-1.4365	4.62525	16.4627	0.000875134	0.0432497	149	147	348	407	856	689	685
	ENSMUSG00000023044.3	Csad	-0.619399	5.39937	22.6562	0.000199955	0.0212816	585	502	767	704	1074	1166	899
	ENSMUSG00000023067.15	Cdkn1a	1.82084	6.46143	15.5017	0.00113021	0.047231	4005	4869	2771	1923	946	983	1246
	ENSMUSG00000023341.16	Mx2	2.29048	3.12695	17.6466	0.000645625	0.0381287	216	361	351	471	64	78	86
	ENSMUSG00000023505.14	Cdca3	1.26239	2.54886	17.4129	0.000684957	0.0388221	122	149	161	177	66	55	82
	ENSMUSG00000024079.5	Eif2ak2	1.23599	5.26262	17.5284	0.000665195	0.0386959	982	1131	1390	1222	525	489	589
	ENSMUSG00000024334.10	H2-Oa	-1.14525	2.78876	15.9494	0.00100223	0.0455503	57	41	81	124	172	212	147
	ENSMUSG00000024640.10	Psat1	0.702137	3.96441	17.091	0.000743608	0.0403836	346	356	432	403	302	236	223
	ENSMUSG00000024679.11	Ms4a6d	2.00842	3.46269	31.9173	3.30819e-05	0.00885909	420	355	313	369	99	77	118
	ENSMUSG00000024810.17	Il33	1.31369	6.65793	24.5002	0.000135159	0.0176411	3371	3077	4109	2397	1051	1391	1715
	ENSMUSG00000024966.10	Stip1	1.06447	6.25194	18.6665	0.000501308	0.0333266	1937	1990	1720	1896	948	944	1037
	ENSMUSG00000024989.16	Cep55	1.61098	1.35249	28.5974	6.02734e-05	0.0112791	65	61	88	95	20	30	30
	ENSMUSG00000025324.9	Atp10a	0.604314	4.67022	19.6409	0.000396551	0.0300115	553	573	609	681	431	447	403
	ENSMUSG00000025408.16	Ddit3	0.833802	4.50289	18.8644	0.00047774	0.0329789	595	471	536	652	355	315	350
	ENSMUSG00000025492.7	Ifitm3	1.67938	8.99691	34.0418	2.30377e-05	0.00771919	15705	14024	17462	21250	5297	5432	6352
	ENSMUSG00000025498.16	Irf7	4.0954	7.10907	67.0385	3.45353e-07	0.000670503	6327	6290	8261	11308	473	461	563
	ENSMUSG00000025602.14	Zfp202	-0.650858	2.3592	17.4755	0.000674161	0.0388221	70	69	93	95	139	150	122
	ENSMUSG00000025780.8	Itih5	-0.963957	3.37963	18.5908	0.000510671	0.0333266	112	109	169	167	293	340	233
	ENSMUSG00000025823.10	Pdia4	0.464131	6.7345	17.3701	0.000692436	0.0388221	2491	2713	2565	2706	2046	2056	2045
	ENSMUSG00000026088.16	Mitd1	0.817687	4.00014	33.0238	2.73441e-05	0.007837	328	386	462	468	244	252	250
	ENSMUSG00000026170.7	Cyp27a1	-0.628515	4.80026	21.7983	0.000241539	0.0233122	353	326	477	444	724	664	590
	ENSMUSG00000026185.9	Igfbp5	-1.39734	8.4795	17.8455	0.000614149	0.0371166	3773	4154	6345	4384	12616	17844	8724
	ENSMUSG00000026304.14	Rab17	-1.41025	0.664251	16.7822	0.000805241	0.0418294	10	8	19	19	49	46	24
	ENSMUSG00000026536.10	Ifi211	2.24832	3.86543	44.3321	4.86354e-06	0.00332191	428	493	498	711	123	113	124
	ENSMUSG00000026594.15	Ralgps2	-0.872816	4.6604	27.0663	8.07454e-05	0.0128237	282	308	527	416	776	777	670
	ENSMUSG00000026678.11	Rgs5	-1.19589	3.36582	16.4679	0.000873935	0.0432497	128	115	200	133	307	454	287
	ENSMUSG00000026822.15	Lcn2	2.26766	7.5925	21.4334	0.000262108	0.023669	8821	7805	7631	5862	1461	1705	1906
	ENSMUSG00000026864.14	Hspa5	0.703692	8.95622	19.2142	0.000439055	0.0318663	13277	15119	12929	12982	8702	8974	9405
	ENSMUSG00000026890.20	Lhx6	-0.720699	2.07921	16.8875	0.000783599	0.0414733	71	66	82	73	119	131	136
	ENSMUSG00000027078.15	Ube2l6	1.35388	5.98536	33.7525	2.41786e-05	0.0077564	1358	2194	1771	2658	736	996	785
	ENSMUSG00000027323.11	Rad51	1.34646	1.68633	28.0028	6.74377e-05	0.0119027	70	80	94	101	30	36	42
	ENSMUSG00000027331.16	Knstrn	1.10572	2.23648	16.3577	0.000899569	0.0435268	116	129	131	136	52	70	69
	ENSMUSG00000027469.17	Tpx2	1.40681	2.60796	29.4697	5.12602e-05	0.01075	136	180	187	193	75	69	67
	ENSMUSG00000027485.16	Bpifb1	1.3566	6.37269	19.7403	0.000387332	0.0294904	2501	1798	2457	2032	1196	1091	503
	ENSMUSG00000027495.5	Fam210b	-0.429095	5.43549	18.9407	0.000468986	0.0328121	663	664	899	846	1212	1143	959
	ENSMUSG00000027496.16	Aurka	1.4103	1.93172	22.8143	0.000193209	0.0209306	107	111	102	119	42	34	57
	ENSMUSG00000027513.12	Pck1	-3.27608	3.06305	18.8745	0.000476563	0.0329789	38	42	85	29	342	1105	48
	ENSMUSG00000027514.15	Zbp1	2.84283	4.83589	48.2234	2.89573e-06	0.0027688	811	911	1112	1954	138	174	216
	ENSMUSG00000027699.20	Ect2	1.60323	2.12049	23.7123	0.000159407	0.0191468	123	123	162	167	53	45	53
	ENSMUSG00000027715.10	Ccna2	1.02179	3.0792	17.9277	0.000601656	0.036791	168	173	217	257	108	84	128
	ENSMUSG00000027793.7	Ccna1	2.55062	0.448345	20.6599	0.000312565	0.0261008	23	24	36	45	5	6	6
	ENSMUSG00000027952.17	Pmvk	1.25169	5.31729	18.7618	0.000489801	0.0333266	1345	1249	971	750	494	496	498
	ENSMUSG00000027954.10	Efna1	-0.789747	6.25067	17.3119	0.000702778	0.0388221	914	922	1369	1268	2306	2043	1822
	ENSMUSG00000028037.14	Ifi44	2.67109	4.4741	21.6705	0.000248531	0.0233122	697	982	1051	1528	167	145	220
	ENSMUSG00000028076.13	Cd1d1	-0.748552	3.89047	16.3824	0.000893767	0.0433812	193	190	302	270	460	484	335
	ENSMUSG00000028111.5	Ctsk	0.892679	5.0055	29.6509	4.95836e-05	0.01075	725	743	839	867	449	465	460
	ENSMUSG00000028633.8	Ctps	0.778807	5.37749	15.9255	0.00100863	0.0455503	993	1022	1264	1084	617	699	719
	ENSMUSG00000028655.12	Mfsd2a	1.58796	2.96975	22.3421	0.000214167	0.0217414	257	284	360	185	61	95	131
	ENSMUSG00000028718.17	Stil	1.36981	1.40813	21.4939	0.000258568	0.023624	61	58	62	82	35	21	26
	ENSMUSG00000028766.11	Alpl	1.36763	2.87529	21.2178	0.000275187	0.024148	248	241	233	187	72	121	92
	ENSMUSG00000028871.8	Rspo1	-0.873264	3.92227	28.6686	5.94746e-05	0.0112654	179	187	255	243	427	487	352
	ENSMUSG00000028873.17	Cdca8	1.44732	1.95176	29.8911	4.74558e-05	0.0106824	101	100	100	113	34	43	45
	ENSMUSG00000028940.3	Hes2	-1.16305	1.93485	15.3339	0.00118286	0.048348	46	31	37	54	118	106	81
	ENSMUSG00000028965.14	Tnfrsf9	1.58244	0.610769	34.7988	2.03282e-05	0.00762407	36	51	50	39	14	15	18
	ENSMUSG00000028967.11	Errfi1	1.14497	7.8347	20.3198	0.000338143	0.0274259	5007	5667	5298	4534	2300	2454	2748
	ENSMUSG00000029155.17	Spata18	0.58526	3.96787	16.6338	0.000836886	0.0424521	294	263	330	320	255	191	202
	ENSMUSG00000029321.2	Slc10a6	1.05974	4.95058	15.8581	0.00102695	0.0458351	754	794	839	773	343	356	517
	ENSMUSG00000029366.11	Dck	1.08146	3.92333	21.5609	0.000254705	0.0235185	484	466	425	395	200	225	253
	ENSMUSG00000029378.6	Areg	1.78843	3.22722	30.4491	4.2898e-05	0.00979841	186	202	304	332	54	75	104
	ENSMUSG00000029561.18	Oasl2	2.5923	7.23197	44.2496	4.91913e-06	0.00332191	5046	5833	6998	8469	1061	1080	1338
	ENSMUSG00000029798.12	Herc6	1.33511	4.8131	17.4028	0.000686718	0.0388221	677	916	931	1121	388	334	436
	ENSMUSG00000029915.15	Clec5a	1.09399	2.44678	18.6522	0.00050307	0.0333266	185	171	146	135	82	70	91
	ENSMUSG00000030107.11	Usp18	2.57305	5.52043	74.2364	1.73816e-07	0.000449952	1483	1632	1915	2675	370	295	370
	ENSMUSG00000030329.12	Pianp	-1.67053	0.613637	16.9466	0.000771741	0.0413334	8	12	23	11	46	62	29
	ENSMUSG00000030468.13	Siglecg	-1.85321	3.914	15.6763	0.00107824	0.0465693	93	104	237	206	496	736	572
	ENSMUSG00000030546.15	Plin1	-2.60635	3.50454	15.171	0.00123666	0.0493772	86	73	152	64	406	1305	105
	ENSMUSG00000030577.15	Cd22	-1.48259	4.56125	17.4117	0.000685164	0.0388221	206	203	397	378	756	976	867
	ENSMUSG00000030616.17	Sytl2	-0.525051	4.64406	21.46	0.000260547	0.0236656	345	387	435	474	729	599	574
	ENSMUSG00000030867.8	Plk1	1.28431	2.07105	27.9117	6.86165e-05	0.0119747	98	109	107	130	59	34	54
	ENSMUSG00000030921.18	Trim30a	1.21303	5.99302	23.5428	0.000165242	0.0194509	1559	2007	2052	2463	925	893	980
	ENSMUSG00000030954.12	Gp2	2.82619	0.757273	27.4622	7.47891e-05	0.0124906	37	25	50	69	10	7	3
	ENSMUSG00000031016.10	Wee1	0.656297	4.25747	21.6299	0.000250799	0.0233258	325	320	443	364	226	262	247
	ENSMUSG00000031431.14	Tsc22d3	1.76148	8.39542	31.4224	3.60762e-05	0.00923313	9098	9194	8127	7450	1977	2832	3269
	ENSMUSG00000031444.17	F10	1.22466	3.02109	16.6886	0.000825052	0.0421563	291	214	208	147	78	105	116
	ENSMUSG00000031489.16	Adrb3	-1.24717	3.81516	21.1319	0.000280598	0.0243477	128	132	201	194	356	621	262
	ENSMUSG00000031838.11	Ifi30	0.813547	5.95637	25.0924	0.000119655	0.0163025	1556	1187	1475	1357	800	798	953
	ENSMUSG00000031995.10	St14	0.480713	5.68059	15.3643	0.00117315	0.0481564	1048	939	1241	1243	952	842	779
	ENSMUSG00000032009.9	Sesn3	-0.52316	5.05314	15.654	0.00108471	0.0465693	409	455	654	559	885	753	743
	ENSMUSG00000032113.17	Chek1	0.964595	0.791538	20.3085	0.000339028	0.0274259	45	43	45	51	28	24	24
	ENSMUSG00000032218.8	Ccnb2	1.50697	2.42225	36.1026	1.64598e-05	0.00701621	112	111	135	185	41	54	57
	ENSMUSG00000032254.11	Kif23	1.10582	2.75267	15.8437	0.00103091	0.0458801	173	191	200	192	88	80	114
	ENSMUSG00000032311.18	Nrg4	-0.967065	1.6007	18.3469	0.000542204	0.0347997	29	39	44	44	80	96	69
	ENSMUSG00000032358.13	Fam83b	1.00441	1.07675	16.2873	0.000916407	0.0436875	48	49	50	40	23	23	29
	ENSMUSG00000032487.9	Ptgs2	1.10298	4.42018	16.9588	0.000769322	0.0413334	594	647	791	448	228	295	398
	ENSMUSG00000032508.9	Myd88	0.691651	5.92264	25.9923	9.97759e-05	0.0147592	1542	1373	1590	1378	988	986	965
	ENSMUSG00000032515.9	Csrnp1	1.35251	5.82759	33.6065	2.47784e-05	0.0077564	1313	1337	1282	1426	445	580	664
	ENSMUSG00000032527.14	Pccb	-0.522076	5.54901	16.6922	0.000824279	0.0421563	661	553	875	751	1177	1186	897
	ENSMUSG00000032661.10	Oas3	3.3728	3.81542	38.1517	1.19395e-05	0.0056195	570	771	630	707	52	64	92
	ENSMUSG00000032690.17	Oas2	2.25593	4.98546	37.194	1.38507e-05	0.00614654	1017	1446	1210	1314	203	268	368
	ENSMUSG00000032783.10	Troap	2.21077	0.310871	34.2198	2.23661e-05	0.00771919	32	34	38	54	9	7	11
	ENSMUSG00000033355.7	Rtp4	2.19596	5.67049	50.0271	2.30168e-06	0.00255355	1564	1652	2101	2455	417	409	524
	ENSMUSG00000033685.14	Ucp2	0.835473	8.89213	24.0075	0.000149792	0.0186125	12213	12558	11077	9884	6874	6407	7562
	ENSMUSG00000033768.18	Nrxn2	-0.78425	4.11623	30.7633	4.05491e-05	0.00960795	242	243	359	269	619	496	421
	ENSMUSG00000033777.5	Tlr13	1.49229	4.05924	17.9774	0.000594235	0.0366113	718	759	414	286	203	186	253
	ENSMUSG00000033880.12	Lgals3bp	2.30096	8.48682	60.6827	6.67011e-07	0.00109113	14031	14235	18054	19087	3321	3726	3559
	ENSMUSG00000033952.15	Aspm	1.28756	1.42753	19.4526	0.000414707	0.0309674	54	76	83	72	25	31	37
	ENSMUSG00000034333.16	Zbed4	0.54606	4.57077	27.7171	7.12159e-05	0.0121309	468	498	609	521	371	381	398
	ENSMUSG00000034459.9	Ifit1	3.39995	6.33165	41.1648	7.61124e-06	0.00407648	2747	3291	4086	5691	385	345	460
	ENSMUSG00000034575.14	Tent4a	0.569698	4.92453	15.9165	0.00101105	0.0455503	599	675	924	827	533	509	580
	ENSMUSG00000034641.3	Cd300ld	1.2404	4.00969	15.2389	0.0012139	0.0491061	564	709	380	274	200	190	284
	ENSMUSG00000034959.9	Rubcnl	-1.04749	1.86585	16.285	0.000916954	0.0436875	43	54	49	51	98	121	110
	ENSMUSG00000035095.12	Fam167a	1.05061	5.15427	22.645	0.000200443	0.0212816	959	836	972	808	515	415	465
	ENSMUSG00000035208.17	Slfn8	1.51734	3.87069	17.3417	0.000697459	0.0388221	332	420	520	631	144	175	208
	ENSMUSG00000035373.3	Ccl7	2.54587	1.43219	21.6593	0.000249152	0.0233122	70	87	80	176	13	18	25
	ENSMUSG00000035385.6	Ccl2	1.89211	1.35923	24.036	0.000148899	0.0186125	68	88	81	120	24	25	28
	ENSMUSG00000035403.11	Crb2	-2.17842	0.840951	18.112	0.000574659	0.0359903	11	18	30	13	84	118	58
	ENSMUSG00000035493.11	Tgfbi	0.959059	6.77866	42.9378	5.90557e-06	0.00357904	3243	2930	2858	2523	1705	1515	1614
	ENSMUSG00000035517.18	Tdrd7	0.610821	5.97069	19.861	0.000376458	0.0293826	1362	1468	1719	1705	1080	1134	1072
	ENSMUSG00000035683.14	Melk	1.37246	1.23454	32.937	2.77514e-05	0.007837	56	64	76	71	22	26	34
	ENSMUSG00000035686.9	Thrsp	-2.58927	4.01546	15.4839	0.00113568	0.047231	109	78	198	80	520	1462	229
	ENSMUSG00000035692.8	Isg15	4.22966	5.62823	72.3749	2.0646e-07	0.000458104	2110	2207	2656	4217	133	161	180
	ENSMUSG00000035852.12	Misp	1.35173	3.48317	41.3075	7.45528e-06	0.00407648	276	251	323	450	151	135	122
	ENSMUSG00000035900.19	Gramd4	-0.619132	5.38077	16.0016	0.000988397	0.0455503	603	611	854	716	1212	1282	930
	ENSMUSG00000035936.7	Aldh5a1	-0.918137	4.03921	29.5543	5.04693e-05	0.01075	179	155	278	214	469	420	353
	ENSMUSG00000036395.16	Glb1l2	-0.73441	5.51286	28.5117	6.12508e-05	0.0113256	547	486	803	822	1298	1294	931
	ENSMUSG00000036777.9	Anln	0.92029	3.08569	22.4516	0.000209089	0.0216504	192	248	269	255	146	120	143
	ENSMUSG00000036887.6	C1qa	1.21291	5.89903	20.6619	0.000312422	0.0261008	1498	1417	1664	1835	736	755	732
	ENSMUSG00000036896.6	C1qc	1.11154	5.82828	19.7503	0.000386413	0.0294904	1356	1319	1547	1629	763	742	674
	ENSMUSG00000036912.19	Piwil4	1.14189	2.63334	19.2409	0.000436245	0.0318111	169	217	223	166	99	83	101
	ENSMUSG00000037095.9	Lrg1	1.8194	7.06113	18.971	0.00046555	0.0328121	5672	5590	5540	3255	1192	1873	1542
	ENSMUSG00000037411.11	Serpine1	1.00552	5.59953	16.5557	0.000854099	0.0427971	985	1189	1140	1242	423	648	747
	ENSMUSG00000037474.14	Dtl	1.34768	1.51871	19.1195	0.000449168	0.0322985	65	82	101	64	30	40	28
	ENSMUSG00000037544.15	Dlgap5	1.5673	1.38035	29.4203	5.1728e-05	0.01075	45	69	83	81	17	24	33
	ENSMUSG00000037818.17	Abhd18	-0.983197	2.67284	15.3582	0.00117508	0.0481564	72	93	115	80	238	174	161
	ENSMUSG00000037921.16	Ddx60	1.502	3.59067	15.981	0.000993835	0.0455503	309	358	508	476	181	149	135
	ENSMUSG00000037974.17	Muc5ac	1.26875	1.90134	16.8241	0.000796539	0.041656	90	78	124	83	42	45	37
	ENSMUSG00000038074.17	Fkbp14	0.667317	4.51101	16.3022	0.000912819	0.0436875	509	702	649	511	401	404	403
	ENSMUSG00000038119.16	Cdon	-0.608491	4.46436	19.2939	0.000430736	0.0317071	319	331	472	356	598	726	478
	ENSMUSG00000038175.11	Mylip	-0.729194	5.16573	20.1885	0.000348633	0.0280568	436	420	737	547	895	991	920
	ENSMUSG00000038332.14	Sesn1	-0.378563	5.41995	19.2714	0.000433071	0.0317286	736	655	835	758	1133	1084	907
	ENSMUSG00000038642.11	Ctss	1.08278	7.46067	27.6705	7.18543e-05	0.0121309	4820	4089	5103	5300	2456	2250	2613
	ENSMUSG00000038777.20	Sema6c	-1.16306	2.35068	15.1476	0.00124458	0.0495663	49	47	70	65	160	155	100
	ENSMUSG00000038943.17	Prc1	1.10678	3.11148	23.1845	0.000178383	0.0200771	205	225	276	242	98	117	136
	ENSMUSG00000039236.19	Isg20	1.30008	5.79174	19.6251	0.00039804	0.0300115	1328	1540	1388	1680	659	677	616
	ENSMUSG00000039682.13	Lap3	0.760844	5.43408	21.7354	0.000244949	0.0233122	1023	980	1057	1105	631	683	667
	ENSMUSG00000039783.16	Kmo	-0.892677	2.63721	17.5689	0.000658411	0.0384453	66	69	104	107	155	184	171
	ENSMUSG00000039850.17	Endov	-0.626078	4.86042	15.9027	0.00101478	0.0455503	399	389	568	518	888	741	684
	ENSMUSG00000039911.14	Spsb1	0.780116	4.92093	15.4912	0.00113345	0.047231	827	819	684	616	500	489	415
	ENSMUSG00000039977.17	Deup1	1.40966	2.78562	16.5431	0.000856935	0.0427971	170	119	179	226	66	63	79
	ENSMUSG00000040003.19	Magi2	-0.892529	2.56232	18.0314	0.000586289	0.036425	68	73	99	81	186	148	144
	ENSMUSG00000040026.9	Saa3	4.55089	3.16454	47.0212	3.38702e-06	0.0027688	553	529	348	616	22	25	24
	ENSMUSG00000040078.10	Ptges3-ps	0.804934	3.60217	23.9149	0.000152736	0.0186795	289	304	260	271	166	190	167
	ENSMUSG00000040204.7	Pclaf	1.41004	2.34617	28.4128	6.24014e-05	0.0114026	92	117	127	145	55	37	53
	ENSMUSG00000040247.7	Tbc1d10c	-0.914988	4.05247	19.0199	0.000460087	0.0327801	186	195	283	251	393	498	479
	ENSMUSG00000040483.16	Xaf1	1.78381	5.52653	47.8806	3.02715e-06	0.0027688	1269	1410	1790	2243	492	433	624
	ENSMUSG00000040557.15	Mettl27	-0.8783	3.68183	23.3487	0.000172221	0.0197461	150	109	229	167	389	330	239
	ENSMUSG00000040592.12	Cd79b	-1.08361	4.93804	15.6199	0.00109474	0.0467128	299	209	550	555	738	1108	825
	ENSMUSG00000040659.4	Efhd2	0.39152	6.8357	16.5053	0.000865431	0.0430829	2372	2114	2564	2447	1969	2017	1842
	ENSMUSG00000040663.10	Clcf1	-1.20005	4.38721	17.3438	0.00069709	0.0388221	200	222	368	308	693	688	618
	ENSMUSG00000040820.17	Hlcs	-0.711016	4.2265	20.9194	0.000294508	0.0251335	260	240	343	273	493	504	464
	ENSMUSG00000040899.15	Ccr6	-1.95406	0.533298	21.7761	0.000242735	0.0233122	6	11	20	15	52	58	50
	ENSMUSG00000041347.6	Bdkrb1	1.31474	2.44044	24.7079	0.000129478	0.0173367	125	126	158	121	46	58	66
	ENSMUSG00000041431.17	Ccnb1	1.89041	2.14359	27.842	6.95348e-05	0.0120002	114	117	125	137	44	23	40
	ENSMUSG00000041538.17	H2-Ob	-1.32451	4.91976	17.4398	0.000680286	0.0388221	250	217	528	538	883	1104	1009
	ENSMUSG00000041653.6	Pnpla3	-3.18984	0.712784	24.1814	0.000144432	0.0182383	6	7	13	10	68	169	28
	ENSMUSG00000041679.10	Lrrc29	-0.828381	2.4889	18.7389	0.000492543	0.0333266	70	66	113	78	197	143	124
	ENSMUSG00000041737.9	Tmem45b	-2.44373	1.63858	15.7574	0.00105499	0.0462886	25	15	36	13	97	263	28
	ENSMUSG00000041827.16	Oasl1	2.80475	3.48729	43.9163	5.15095e-06	0.00333352	291	328	496	715	53	78	75
	ENSMUSG00000042265.14	Trem1	2.1831	2.69448	19.8356	0.000378712	0.0294108	298	403	171	81	46	57	72
	ENSMUSG00000042417.6	Ccno	1.97184	2.71588	33.3189	2.60093e-05	0.007837	208	188	202	224	61	51	57
	ENSMUSG00000042510.8	AA986860	1.21322	6.78323	38.5247	1.12768e-05	0.00547346	2726	2864	3053	2337	1233	1250	1339
	ENSMUSG00000042622.15	Maff	1.19234	5.12471	29.0944	5.49381e-05	0.01075	956	932	940	628	370	417	438
	ENSMUSG00000042784.10	Muc1	0.596822	7.91801	15.5463	0.00111669	0.047231	5566	5601	6718	5643	3922	3968	4584
	ENSMUSG00000042787.16	Exog	0.640425	3.3304	16.2175	0.000933438	0.0441627	198	205	264	270	134	149	195
	ENSMUSG00000043091.10	Tuba1c	0.950067	6.15143	21.3493	0.000267122	0.0238445	1824	1601	1959	1686	957	998	989
	ENSMUSG00000043099.5	Hic1	-0.921508	4.74325	18.8452	0.000479969	0.0329862	344	303	445	354	863	733	603
	ENSMUSG00000043122.8	A530016L24Rik	-2.90974	1.40684	18.2624	0.000553637	0.0350983	16	8	30	15	109	274	29
	ENSMUSG00000043939.17	A530064D06Rik	2.65376	1.47806	33.2656	2.62452e-05	0.007837	118	142	64	50	10	20	19
	ENSMUSG00000043993.7	2900052L18Rik	-1.29738	2.82078	22.4206	0.000210514	0.0216537	79	81	90	93	274	239	170
	ENSMUSG00000044156.15	Hepacam2	-0.712104	2.4436	15.5095	0.00112784	0.047231	65	56	82	74	112	120	130
	ENSMUSG00000044867.6	Gimap1os	-1.34792	1.01641	18.9846	0.000464027	0.0328121	16	18	23	31	49	73	57
	ENSMUSG00000045193.14	Cirbp	-1.24985	6.22395	30.9747	3.90498e-05	0.00960795	711	538	1213	966	2866	2019	1580
	ENSMUSG00000045231.6	BC106179	-1.20926	1.02736	18.7221	0.000494559	0.0333266	17	22	27	31	66	59	55
	ENSMUSG00000046718.9	Bst2	1.95989	6.83264	58.5536	8.41951e-07	0.00118884	3734	3576	3921	6024	1091	1250	1214
	ENSMUSG00000046731.6	Kctd11	0.400924	5.19001	21.141	0.000280018	0.0243477	792	737	896	818	673	649	653
	ENSMUSG00000046879.8	Irgm1	1.35174	6.26305	16.2093	0.000935458	0.0441627	1766	1844	2376	3211	883	836	1143
	ENSMUSG00000047250.14	Ptgs1	0.670168	6.34358	16.8673	0.000787704	0.0414733	2005	2217	2865	1783	1374	1575	1510
	ENSMUSG00000047986.13	Palm3	-1.80801	0.886322	18.2262	0.000558622	0.0352704	17	9	18	21	84	56	44
	ENSMUSG00000048327.7	Ckap2l	1.61079	2.57798	22.0679	0.000227504	0.022507	153	154	201	232	58	71	64
	ENSMUSG00000048922.19	Cdca2	1.38016	1.22625	24.3498	0.000139448	0.0178099	69	61	82	68	31	24	31
	ENSMUSG00000049307.7	Fut4	0.768279	3.4133	21.3204	0.000268872	0.0238636	280	257	305	232	148	158	200
	ENSMUSG00000049382.11	Krt8	0.746121	7.8221	17.1893	0.000725108	0.0396563	5307	4761	5753	5477	3655	3321	3255
	ENSMUSG00000049401.11	Ogfr	0.677409	5.8061	35.1133	1.93092e-05	0.00749776	1189	1110	1515	1607	916	928	865
	ENSMUSG00000049734.10	Trex1	1.22693	4.23955	27.0941	8.03097e-05	0.0128237	478	367	616	703	247	235	252
	ENSMUSG00000049922.9	Slc35c1	0.435463	5.21017	23.2266	0.00017678	0.0200419	780	740	952	832	627	665	665
	ENSMUSG00000049932.4	H2ax	0.862461	4.19057	20.4249	0.000329996	0.0269763	427	360	425	476	237	245	264
	ENSMUSG00000050370.6	Ch25h	1.5174	3.43967	35.4288	1.83444e-05	0.00749776	364	318	261	285	80	132	136
	ENSMUSG00000051439.8	Cd14	1.19454	5.53258	16.43	0.000882673	0.0432497	1123	1306	1109	1197	562	552	566
	ENSMUSG00000051969.8	Tlr11	-1.35996	0.784718	18.6359	0.00050508	0.0333266	13	11	18	24	56	40	40
	ENSMUSG00000052013.16	Btla	-1.36716	4.02674	20.1274	0.000353646	0.0281684	214	138	224	239	528	593	558
	ENSMUSG00000052212.7	Cd177	1.81336	3.8514	27.0557	8.09117e-05	0.0128237	623	577	466	437	164	207	120
	ENSMUSG00000052291.9	5330438D12Rik	-0.857631	1.75264	16.6483	0.000833746	0.0424521	45	46	69	38	113	100	75
	ENSMUSG00000052776.11	Oas1a	3.03314	4.87027	105.595	1.48599e-08	8.28786e-05	1195	1088	1362	1690	164	147	209
	ENSMUSG00000052957.9	Gas1	-0.895605	4.82243	18.6028	0.00050918	0.0333266	360	405	498	482	809	1066	726
	ENSMUSG00000053093.17	Myh7	-1.22175	4.40608	15.5493	0.00111576	0.047231	203	226	329	220	760	617	453
	ENSMUSG00000053113.4	Socs3	1.32281	5.96223	34.7131	2.06162e-05	0.00762407	1895	2504	1747	1732	829	878	869
	ENSMUSG00000053475.6	Tnfaip6	1.16623	0.859015	21.9348	0.000234315	0.0228892	43	45	56	54	16	25	29
	ENSMUSG00000054021.7	Sirt5	-0.547213	3.27889	15.6574	0.00108371	0.0465693	118	106	177	175	261	225	185
	ENSMUSG00000054046.8	Klk13	1.3312	2.50254	18.3148	0.000546523	0.0349325	164	123	142	151	60	67	59
	ENSMUSG00000054074.10	Skida1	-0.737896	2.53196	22.1203	0.000224887	0.022507	74	77	104	92	190	145	130
	ENSMUSG00000054203.8	Ifi205	1.55789	3.7133	47.1295	3.33911e-06	0.0027688	305	391	340	495	136	162	122
	ENSMUSG00000054519.9	Zfp867	-0.543179	3.41383	17.6597	0.000643498	0.0381287	162	160	170	175	291	248	247
	ENSMUSG00000054676.18	1600014C10Rik	0.626214	5.02707	19.591	0.000401278	0.0301094	806	769	730	757	540	602	470
	ENSMUSG00000054945.5	Gm9958	-1.03135	1.20691	15.7845	0.00104736	0.0460994	40	17	38	35	96	61	57
	ENSMUSG00000055235.12	Wdr86	-1.20259	0.756187	17.7336	0.000631638	0.0377331	20	21	27	15	65	57	33
	ENSMUSG00000055541.19	Lair1	0.581695	3.55295	15.6415	0.00108838	0.0465693	228	243	281	262	160	167	215
	ENSMUSG00000055862.8	Izumo4	-0.933841	4.6259	15.7094	0.00106867	0.0464946	284	294	430	358	818	632	636
	ENSMUSG00000056116.19	H2-T22	0.97223	7.06365	18.5418	0.000516837	0.0335879	2891	2715	3582	4877	1701	1856	2144
	ENSMUSG00000056185.6	Snx32	-0.683116	3.77762	18.612	0.000508038	0.0333266	215	193	247	202	390	393	325
	ENSMUSG00000056418.4	BC043934	-1.18233	1.7095	24.3758	0.000138694	0.0178099	28	28	46	53	119	84	78
	ENSMUSG00000056445.9	Hoxaas2	-1.58202	1.65889	41.6836	7.06087e-06	0.00406183	22	26	42	43	128	109	81
	ENSMUSG00000056468.4	5730596B20Rik	-2.06787	0.455604	16.7293	0.000816355	0.042125	15	6	14	13	69	50	44
	ENSMUSG00000056938.17	Acbd4	-0.53995	4.80368	17.8849	0.000608135	0.0370414	390	343	490	440	729	668	543
	ENSMUSG00000057135.13	Scimp	1.00494	1.99171	16.4287	0.000882972	0.0432497	88	82	102	122	38	51	67
	ENSMUSG00000057346.13	Apol9a	3.23185	2.9905	47.836	3.04473e-06	0.0027688	319	396	441	504	45	44	52
	ENSMUSG00000057596.14	Trim30d	1.20085	4.86417	17.9842	0.000593231	0.0366113	747	946	1047	1103	480	424	438
	ENSMUSG00000057880.13	Abat	-0.769234	2.99273	21.2453	0.000273478	0.0241344	112	83	143	126	231	256	146
	ENSMUSG00000058145.17	Adamts17	-1.05543	2.0653	15.7184	0.00106611	0.0464946	49	55	68	82	186	120	119
	ENSMUSG00000058163.15	Gm5431	2.90004	3.0214	40.7412	8.09657e-06	0.00419186	311	345	359	500	60	50	53
	ENSMUSG00000058756.14	Thra	-0.672977	7.00077	18.4181	0.000532785	0.034337	1807	1761	2546	2311	4115	3621	3015
	ENSMUSG00000059089.5	Fcgr4	1.84934	3.5061	21.54	0.0002559	0.0235185	370	442	356	245	72	90	155
	ENSMUSG00000059201.13	Lep	-3.45673	0.294987	16.8691	0.000787335	0.0414733	1	4	10	6	43	129	14
	ENSMUSG00000059336.15	Slc14a1	-1.71781	1.12412	19.4299	0.000416956	0.0309864	14	13	19	28	64	73	58
	ENSMUSG00000059479.8	B3gnt8	-0.563974	3.74398	21.0783	0.000284033	0.0245089	186	179	234	201	336	338	276
	ENSMUSG00000059772.13	Slx1b	-0.559087	4.15172	16.6237	0.000839093	0.0424521	256	219	356	290	490	429	399
	ENSMUSG00000060188.7	Cxcl17	1.72018	5.88524	17.7758	0.000624986	0.0374973	1744	1293	1679	1356	546	513	431
	ENSMUSG00000060301.7	2610008E11Rik	-0.493965	4.87897	17.2264	0.000718271	0.0394212	409	423	602	510	787	673	725
	ENSMUSG00000060969.10	Irx1	1.20289	6.75803	16.9758	0.000765961	0.0413087	2128	2157	3414	2636	840	1175	1519
	ENSMUSG00000061100.6	Retnla	4.13085	7.41073	60.2035	7.02506e-07	0.00109113	9275	9034	8456	6943	618	522	433
	ENSMUSG00000061232.17	H2-K1	1.05655	10.5302	28.0797	6.64583e-05	0.0118647	40371	35095	43484	52503	21291	20720	23996
	ENSMUSG00000062248.6	Cks2	1.08661	2.29523	16.8261	0.000796138	0.041656	104	104	119	131	58	55	60
	ENSMUSG00000062257.14	Opcml	-1.13181	0.744484	15.8993	0.00101569	0.0455503	12	16	21	24	58	42	29
	ENSMUSG00000062488.10	Ifit3b	2.67901	5.44432	21.7369	0.000244869	0.0233122	1272	1533	1990	2760	276	321	338
	ENSMUSG00000062593.18	Gm49339	1.2998	3.91468	15.3783	0.00116868	0.0481564	500	602	422	355	146	231	245
	ENSMUSG00000062991.10	Nrg1	0.805256	3.06645	19.062	0.000455429	0.0325978	203	222	247	199	124	120	156
	ENSMUSG00000063430.10	Wscd2	-0.891102	1.92278	17.3003	0.000704856	0.0388221	52	48	70	47	129	116	79
	ENSMUSG00000063632.7	Sox11	-1.52472	4.52233	25.4867	0.000110442	0.0157374	198	218	312	314	895	738	758
	ENSMUSG00000063873.11	Slc24a3	-0.581884	4.52177	15.1785	0.00123411	0.0493772	305	338	446	406	687	594	513
	ENSMUSG00000066108.8	Muc5b	1.42802	6.79405	20.0804	0.000357553	0.0283342	3086	3134	4308	3282	1716	1465	952
	ENSMUSG00000066861.15	Oas1g	3.82691	3.07859	102.952	1.78085e-08	8.28786e-05	377	422	500	540	26	38	39
	ENSMUSG00000067212.9	H2-T23	1.12653	8.18423	28.1767	6.52474e-05	0.011784	7340	7180	9000	11593	3809	3957	5038
	ENSMUSG00000067279.4	Ppp1r3c	-0.66517	4.1358	16.3029	0.000912634	0.0436875	257	281	354	298	617	472	430
	ENSMUSG00000068105.12	Tnfrsf13c	-1.46334	1.67846	15.9544	0.0010009	0.0455503	23	26	66	38	85	143	101
	ENSMUSG00000068245.15	Phf11d	1.71959	5.61342	32.3656	3.06084e-05	0.00838996	1381	1490	1878	2480	604	519	627
	ENSMUSG00000068246.7	Apol9b	2.56618	3.66543	37.4247	1.33607e-05	0.0061035	427	384	580	876	99	92	112
	ENSMUSG00000069255.14	Dusp22	-0.417168	4.50779	19.1454	0.000446369	0.0322465	357	336	481	369	565	570	513
	ENSMUSG00000069793.13	Slfn9	2.39918	3.26585	26.5408	8.94921e-05	0.0137623	322	395	423	494	67	78	102
	ENSMUSG00000070427.5	Il18bp	1.64228	3.94576	42.8358	5.99118e-06	0.00357904	427	446	516	772	170	198	185
	ENSMUSG00000071637.6	Cebpd	2.00863	6.99917	29.1563	5.43111e-05	0.01075	4254	3709	3147	2950	777	929	1136
	ENSMUSG00000072082.8	Ccnf	0.92725	1.95664	17.8476	0.00061384	0.0371166	96	79	105	104	57	54	51
	ENSMUSG00000072620.4	Slfn2	1.20464	5.91946	33.9589	2.33583e-05	0.00771919	1620	1505	1613	1668	611	749	873
	ENSMUSG00000072640.12	Lyrm9	-0.621102	3.63226	16.731	0.000816004	0.042125	185	146	217	209	328	336	269
	ENSMUSG00000072915.4	Gm12258	-1.38612	3.37324	16.0915	0.000965072	0.0450135	131	103	153	133	456	356	283
	ENSMUSG00000073408.3	Mucl3	2.39057	0.854088	25.3765	0.000112934	0.0158026	79	55	61	27	8	11	15
	ENSMUSG00000073411.13	H2-D1	0.980735	10.6363	17.468	0.000675433	0.0388221	43543	39484	45579	50752	22703	22820	27405
	ENSMUSG00000073489.7	Ifi204	1.90125	4.06468	46.0088	3.87403e-06	0.00300857	452	496	560	728	146	177	156
	ENSMUSG00000073490.12	Ifi207	1.37331	4.13791	31.1039	3.81641e-05	0.00956072	559	541	510	501	191	222	246
	ENSMUSG00000074476.7	Spc24	1.52693	1.93703	33.5609	2.49691e-05	0.0077564	103	107	121	102	48	32	41
	ENSMUSG00000074651.4	Mcidas	2.30321	0.802249	26.4503	9.1104e-05	0.0138728	61	59	66	57	27	7	6
	ENSMUSG00000074671.7	Tspyl3	-0.67295	3.09914	17.3187	0.000701559	0.0388221	96	101	148	157	236	229	174
	ENSMUSG00000074677.12	Sirpb1c	1.20508	4.27161	24.3345	0.000139892	0.0178099	604	528	492	465	250	227	260
	ENSMUSG00000074896.4	Ifit3	2.90895	7.70475	30.725	4.0827e-05	0.00960795	6293	7177	9616	14297	1261	1335	1352
	ENSMUSG00000076431.5	Sox4	-1.14193	5.47254	17.1228	0.000737561	0.0401958	458	470	833	755	1710	1438	1254
	ENSMUSG00000078763.3	Slfn1	1.86295	3.87994	23.0036	0.000185462	0.0207237	720	713	333	326	145	160	174
	ENSMUSG00000078922.10	Tgtp1	2.75737	5.60158	22.8136	0.000193236	0.0209306	1370	1548	1876	3033	241	308	368
	ENSMUSG00000079017.4	Ifi27l2a	3.05906	6.93932	39.0523	1.04088e-05	0.00521514	6175	5207	6022	7070	537	1240	584
	ENSMUSG00000079419.5	Ms4a6c	1.57183	4.39063	36.0068	1.67139e-05	0.00701621	756	500	476	672	234	185	239
	ENSMUSG00000079553.12	Kifc1	1.21043	1.85285	16.1741	0.000944201	0.0444404	73	76	103	116	33	45	48
	ENSMUSG00000083261.5	Gm7816	1.53827	4.43611	16.5462	0.00085622	0.0427971	571	611	495	545	128	239	251
	ENSMUSG00000083282.4	Ctsf	-0.459006	4.75271	15.3217	0.0011868	0.0483816	370	306	445	435	601	636	477
	ENSMUSG00000083396.2	Gm15542	1.58883	5.82705	18.7196	0.000494858	0.0333266	1319	1594	1392	1522	421	528	613
	ENSMUSG00000083899.3	Gm12346	1.16327	5.75992	15.9887	0.000991801	0.0455503	1272	1652	1199	1465	654	651	726
	ENSMUSG00000084915.3	C230037L18Rik	-1.75781	0.47376	16.0619	0.000972691	0.0452331	12	12	13	13	59	45	34
	ENSMUSG00000085289.2	Gm15337	-1.0914	0.530638	15.1999	0.0012269	0.0493686	18	14	23	16	51	40	31
	ENSMUSG00000085882.2	2610507I01Rik	-0.74296	4.01905	20.7045	0.000309375	0.0261008	182	218	300	284	470	428	415
	ENSMUSG00000086746.3	Gm15222	-1.18369	1.78974	17.5879	0.000655267	0.038406	34	36	53	42	126	97	78
	ENSMUSG00000087177.8	E130307A14Rik	-0.651626	3.68552	15.3713	0.00117089	0.0481564	154	121	217	235	345	307	257
	ENSMUSG00000089901.2	Gm8113	-2.05502	1.90085	26.6956	8.68102e-05	0.0136196	19	28	42	36	152	165	98
	ENSMUSG00000090231.11	Cfb	1.9228	6.32024	34.5612	2.11381e-05	0.00763527	2865	3334	3909	4481	1075	1192	822
	ENSMUSG00000090622.2	A930033H14Rik	-1.06632	0.86235	15.4067	0.00115969	0.0480327	23	12	36	27	70	49	44
	ENSMUSG00000091549.2	Gm6548	0.853392	4.50323	45.1724	4.33609e-06	0.00320706	520	561	668	671	375	331	368
	ENSMUSG00000091649.4	Phf11b	1.41032	3.03378	20.9434	0.000292902	0.0251335	139	176	268	377	83	92	109
	ENSMUSG00000091811.3	Inafm1	-0.573861	4.81344	15.2289	0.00121722	0.0491061	391	370	580	417	786	724	581
	ENSMUSG00000093553.2	Gm20633	-1.2955	1.46251	23.4736	0.000167693	0.0195835	27	26	50	31	108	81	73
	ENSMUSG00000093577.2	Gm20632	-0.922596	2.1043	15.4931	0.00113287	0.047231	62	51	75	38	125	124	96
	ENSMUSG00000093593.2	Gm20683	-1.24924	2.4888	31.3933	3.6262e-05	0.00923313	69	57	95	60	162	219	152
	ENSMUSG00000093798.3	Gm8355	1.68881	4.28668	23.3303	0.000172899	0.0197461	540	598	348	662	110	205	226
	ENSMUSG00000094006.3	Igkv4-59	-2.1913	0.942356	17.3897	0.000689005	0.0388221	29	9	26	16	46	96	147
	ENSMUSG00000094910.2	D430019H16Rik	-0.925912	4.17135	21.9918	0.000231374	0.022745	184	205	329	299	498	534	498
	ENSMUSG00000095028.7	Sirpb1b	1.63553	3.35192	15.175	0.00123527	0.0493772	442	401	209	175	101	98	129
	ENSMUSG00000095253.5	Zfp799	-0.743934	3.24587	15.6473	0.00108667	0.0465693	154	140	147	117	307	212	241
	ENSMUSG00000097601.3	Gm26660	-1.46813	1.58681	20.0294	0.000361848	0.0285291	28	23	42	38	139	81	71
	ENSMUSG00000097617.3	Gm10687	-0.933107	3.24449	24.6404	0.000131294	0.0174295	115	102	187	170	321	299	250
	ENSMUSG00000097729.3	2310015A10Rik	-0.636759	3.27576	15.8201	0.00103742	0.0460376	143	132	161	163	297	252	203
	ENSMUSG00000100801.2	Gm15459	1.46779	8.04125	27.3585	7.63008e-05	0.0126075	6620	7968	6065	7731	1985	2839	3467
	ENSMUSG00000104213.6	Ighd	-1.76909	5.35091	17.7739	0.000625277	0.0374973	241	164	713	654	1414	1722	1506
	ENSMUSG00000105987.5	AI506816	0.563625	5.06289	15.522	0.00112402	0.047231	759	863	921	787	551	566	693
	ENSMUSG00000107134.2	Gm42528	-0.99031	3.36056	17.6283	0.000648609	0.0381598	115	116	215	119	355	272	264
	ENSMUSG00000110317.2	Gm45250	-1.64783	1.61413	15.7833	0.00104771	0.0460994	35	27	40	27	145	116	67
	ENSMUSG00000110656.2	Gm20735	-1.01929	0.671981	16.6883	0.000825105	0.0421563	19	13	24	20	54	40	30
	ENSMUSG00000110945.2	Gm9856	-0.771679	2.87825	25.5302	0.000109477	0.0157374	135	81	142	141	242	213	226
	ENSMUSG00000112280.2	A830082N09Rik	-1.02266	0.763863	18.9219	0.00047112	0.0328136	17	18	28	26	61	45	39
	ENSMUSG00000112808.2	Gm4739	0.759444	3.60444	16.1034	0.000962039	0.0450135	234	207	256	266	163	138	156
	ENSMUSG00000113440.2	Gm46404	-1.17619	1.15902	16.4178	0.000885489	0.0432497	17	20	27	40	86	56	47
	ENSMUSG00000113831.2	Gm49602	-0.753181	3.01184	18.7126	0.000495706	0.0333266	75	90	151	128	219	192	182
	ENSMUSG00000114470.2	Gm49395	-1.09144	2.0396	16.4054	0.000888391	0.0432555	50	47	60	37	130	105	99
	ENSMUSG00000115317.2	Gm32618	-1.04617	1.36378	29.3567	5.23377e-05	0.01075	23	32	37	35	79	72	60
	ENSMUSG00000115902.2	D730005E14Rik	1.07989	2.41771	15.8922	0.00101764	0.0455503	174	197	130	150	80	82	90
	ENSMUSG00000116180.2	Gm49492	-1.20848	2.61342	24.5207	0.000134585	0.0176411	74	48	83	106	220	190	165
	ENSMUSG00000116632.2	Magef1	-0.798612	2.98284	16.9977	0.000761645	0.041219	109	111	130	142	281	224	186
	ENSMUSG00000116656.2	Gm49708	-1.05069	2.4407	15.7233	0.00106471	0.0464946	69	54	68	73	171	174	98
	ENSMUSG00000117775.2	Gm50462	-1.01856	1.63941	16.9253	0.000775998	0.0414186	40	35	60	38	108	87	85
	ENSMUSG00000118423.2	Lrrc70	-1.06708	0.960866	23.3611	0.000171764	0.0197461	20	22	25	28	57	42	61
	ENSMUSG00000118669.2	Arvcf	-0.796866	5.26172	29.2123	5.37516e-05	0.01075	474	477	692	665	1154	1073	973
	ENSMUSG00000118672.1	Muc4	1.59857	5.58872	34.2634	2.22049e-05	0.00771919	1385	1495	1889	1538	414	686	561

## Sheet: S10 File, sheet E
ET26 - 4dpi - orthoDEGs	HUGO ID	logFC	FDR
	SLFN4	3.34954	0.0173367
Differentially expressed genes were filtered to retain only those with a human orthologue in the Ensembl database	DGKE	-0.66059	0.01075
	CTTNBP2	-1.04474	0.0267188
	HAAO	-1.39166	0.0436875
	LGALS9	1.34165	0.0159293
	TIMP1	1.79978	0.0209306
	UHRF1	1.47905	0.01075
	UBE2C	2.18614	0.0281137
	CYP51	0.722555	0.0212816
	TUBB6	0.782125	0.0455503
	DBF4	0.693134	0.0465693
	IRF9	1.21936	0.00149755
	SEC14L2	0.793869	0.0158026
	CP	0.686506	0.0426968
	KIF20A	1.42365	0.0137623
	DNAJB11	0.512258	0.0491061
	MTHFD2	1.0383	0.0233122
	MMP8	3.84116	0.047231
	ITGAE	-0.844316	0.0191468
	GGT5	0.811222	0.0160075
	CDC20	1.03819	0.0366113
	RNF114	0.492528	0.0441627
	RBM14	0.567984	0.0328121
	PDK1	-0.605599	0.022507
	BCL2L1	0.982035	0.048796
	CCL8	1.93118	0.0316679
	NUAK2	0.558776	0.0352989
	TNFRSF13B	-0.823145	0.0293826
	IFI35	0.865796	0.0188074
	KIF11	1.08077	0.0219361
	HSPA8	1.46888	0.0141348
	NFE2L2	0.588125	0.007837
	FCGR1	1.92986	0.00838996
	LBP	0.552358	0.0333266
	BRCA1	1.14124	0.0153927
	PSMD11	0.312392	0.047231
	BIRC5	1.56093	0.00234719
	DHX58	1.87196	0.01075
	KPNA2	0.746685	0.0208441
	ADORA2B	0.85429	0.0388221
	ALOX15	-2.06759	0.0432497
	CCL9	1.26773	0.0388221
	DUSP6	0.712776	0.0267188
	CRY1	0.544892	0.045311
	SLC36A2	-0.697471	0.0269763
	PHYKPL	-0.62324	0.0294904
	IGFBP3	-0.722103	0.023709
	NAMPT	0.584213	0.00965305
	CMPK2	1.59226	0.0217414
	RSAD2	2.67277	0.0128237
	SLC26A4	1.31146	0.0186795
	AURKB	1.63124	0.00749776
	TOP2A	1.57009	0.01075
	SERPINA3N	1.55317	0.0360287
	ALDH6A1	-0.500111	0.0350983
	NPC2	1.17675	0.0460994
	SFTPD	1.08798	0.0450135
	GPR65	0.839836	0.0254662
	ITIH4	1.47656	0.000251644
	EPSTI1	0.988788	0.0208441
	PBK	1.55335	0.0381287
	ACOD1	3.6437	0.0416564
	PSME1	0.74733	0.034337
	GTSE1	1.54733	0.0157374
	RANGAP1	0.454597	0.0294904
	TAB1	-0.701652	0.0414733
	SEPTIN3	-1.72538	0.0216127
	APOD	3.49151	8.28786e-05
	LY6E	1.20933	0.00960795
	ADCY5	-0.576732	0.0455503
	SAMSN1	0.757156	0.0216127
	PARP9	1.03888	0.0141348
	WNT10B	-1.4365	0.0432497
	CSAD	-0.619399	0.0212816
	CDKN1A	1.82084	0.047231
	MX2	2.29048	0.0381287
	CDCA3	1.26239	0.0388221
	EIF2AK2	1.23599	0.0386959
	H2-OA	-1.14525	0.0455503
	PSAT1	0.702137	0.0403836
	MS4A6D	2.00842	0.00885909
	IL33	1.31369	0.0176411
	STIP1	1.06447	0.0333266
	CEP55	1.61098	0.0112791
	ATP10A	0.604314	0.0300115
	DDIT3	0.833802	0.0329789
	IFITM3	1.67938	0.00771919
	IRF7	4.0954	0.000670503
	ZFP202	-0.650858	0.0388221
	ITIH5	-0.963957	0.0333266
	PDIA4	0.464131	0.0388221
	MITD1	0.817687	0.007837
	CYP27A1	-0.628515	0.0233122
	IGFBP5	-1.39734	0.0371166
	RAB17	-1.41025	0.0418294
	IFI211	2.24832	0.00332191
	RALGPS2	-0.872816	0.0128237
	RGS5	-1.19589	0.0432497
	LCN2	2.26766	0.023669
	HSPA5	0.703692	0.0318663
	LHX6	-0.720699	0.0414733
	UBE2L6	1.35388	0.0077564
	RAD51	1.34646	0.0119027
	KNSTRN	1.10572	0.0435268
	TPX2	1.40681	0.01075
	BPIFB1	1.3566	0.0294904
	FAM210B	-0.429095	0.0328121
	AURKA	1.4103	0.0209306
	PCK1	-3.27608	0.0329789
	ZBP1	2.84283	0.0027688
	ECT2	1.60323	0.0191468
	CCNA2	1.02179	0.036791
	CCNA1	2.55062	0.0261008
	PMVK	1.25169	0.0333266
	EFNA1	-0.789747	0.0388221
	IFI44	2.67109	0.0233122
	CD1D1	-0.748552	0.0433812
	CTSK	0.892679	0.01075
	CTPS	0.778807	0.0455503
	MFSD2A	1.58796	0.0217414
	STIL	1.36981	0.023624
	ALPL	1.36763	0.024148
	RSPO1	-0.873264	0.0112654
	CDCA8	1.44732	0.0106824
	HES2	-1.16305	0.048348
	TNFRSF9	1.58244	0.00762407
	ERRFI1	1.14497	0.0274259
	SPATA18	0.58526	0.0424521
	SLC10A6	1.05974	0.0458351
	DCK	1.08146	0.0235185
	AREG	1.78843	0.00979841
	HERC6	1.33511	0.0388221
	CLEC5A	1.09399	0.0333266
	USP18	2.57305	0.000449952
	PIANP	-1.67053	0.0413334
	SIGLECG	-1.85321	0.0465693
	PLIN1	-2.60635	0.0493772
	CD22	-1.48259	0.0388221
	SYTL2	-0.525051	0.0236656
	PLK1	1.28431	0.0119747
	TRIM30A	1.21303	0.0194509
	GP2	2.82619	0.0124906
	WEE1	0.656297	0.0233258
	TSC22D3	1.76148	0.00923313
	F10	1.22466	0.0421563
	ADRB3	-1.24717	0.0243477
	IFI30	0.813547	0.0163025
	ST14	0.480713	0.0481564
	SESN3	-0.52316	0.0465693
	CHEK1	0.964595	0.0274259
	CCNB2	1.50697	0.00701621
	KIF23	1.10582	0.0458801
	NRG4	-0.967065	0.0347997
	FAM83B	1.00441	0.0436875
	PTGS2	1.10298	0.0413334
	MYD88	0.691651	0.0147592
	CSRNP1	1.35251	0.0077564
	PCCB	-0.522076	0.0421563
	OAS3	3.3728	0.0056195
	OAS2	2.25593	0.00614654
	TROAP	2.21077	0.00771919
	RTP4	2.19596	0.00255355
	UCP2	0.835473	0.0186125
	NRXN2	-0.78425	0.00960795
	LGALS3BP	2.30096	0.00109113
	ASPM	1.28756	0.0309674
	ZBED4	0.54606	0.0121309
	IFIT1	3.39995	0.00407648
	TENT4A	0.569698	0.0455503
	CD300LD	1.2404	0.0491061
	RUBCNL	-1.04749	0.0436875
	FAM167A	1.05061	0.0212816
	SLFN8	1.51734	0.0388221
	CCL7	2.54587	0.0233122
	CCL2	1.89211	0.0186125
	CRB2	-2.17842	0.0359903
	TGFBI	0.959059	0.00357904
	TDRD7	0.610821	0.0293826
	MELK	1.37246	0.007837
	THRSP	-2.58927	0.047231
	ISG15	4.22966	0.000458104
	MISP	1.35173	0.00407648
	GRAMD4	-0.619132	0.0455503
	ALDH5A1	-0.918137	0.01075
	GLB1L2	-0.73441	0.0113256
	ANLN	0.92029	0.0216504
	C1QA	1.21291	0.0261008
	C1QC	1.11154	0.0294904
	PIWIL4	1.14189	0.0318111
	LRG1	1.8194	0.0328121
	SERPINE1	1.00552	0.0427971
	DTL	1.34768	0.0322985
	DLGAP5	1.5673	0.01075
	ABHD18	-0.983197	0.0481564
	DDX60	1.502	0.0455503
	MUC5AC	1.26875	0.041656
	FKBP14	0.667317	0.0436875
	CDON	-0.608491	0.0317071
	MYLIP	-0.729194	0.0280568
	SESN1	-0.378563	0.0317286
	CTSS	1.08278	0.0121309
	SEMA6C	-1.16306	0.0495663
	PRC1	1.10678	0.0200771
	ISG20	1.30008	0.0300115
	LAP3	0.760844	0.0233122
	KMO	-0.892677	0.0384453
	ENDOV	-0.626078	0.0455503
	SPSB1	0.780116	0.047231
	DEUP1	1.40966	0.0427971
	MAGI2	-0.892529	0.036425
	PCLAF	1.41004	0.0114026
	TBC1D10C	-0.914988	0.0327801
	XAF1	1.78381	0.0027688
	METTL27	-0.8783	0.0197461
	CD79B	-1.08361	0.0467128
	EFHD2	0.39152	0.0430829
	CLCF1	-1.20005	0.0388221
	HLCS	-0.711016	0.0251335
	CCR6	-1.95406	0.0233122
	BDKRB1	1.31474	0.0173367
	CCNB1	1.89041	0.0120002
	H2-OB	-1.32451	0.0388221
	PNPLA3	-3.18984	0.0182383
	TMEM45B	-2.44373	0.0462886
	OASL1	2.80475	0.00333352
	TREM1	2.1831	0.0294108
	CCNO	1.97184	0.007837
	AA986860	1.21322	0.00547346
	MAFF	1.19234	0.01075
	MUC1	0.596822	0.047231
	EXOG	0.640425	0.0441627
	TUBA1C	0.950067	0.0238445
	HIC1	-0.921508	0.0329862
	A530016L24RIK	-2.90974	0.0350983
	HEPACAM2	-0.712104	0.047231
	CIRBP	-1.24985	0.00960795
	BST2	1.95989	0.00118884
	KCTD11	0.400924	0.0243477
	IRGM1	1.35174	0.0441627
	PTGS1	0.670168	0.0414733
	PALM3	-1.80801	0.0352704
	CKAP2L	1.61079	0.022507
	CDCA2	1.38016	0.0178099
	FUT4	0.768279	0.0238636
	KRT8	0.746121	0.0396563
	OGFR	0.677409	0.00749776
	TREX1	1.22693	0.0128237
	SLC35C1	0.435463	0.0200419
	H2AX	0.862461	0.0269763
	CH25H	1.5174	0.00749776
	CD14	1.19454	0.0432497
	BTLA	-1.36716	0.0281684
	CD177	1.81336	0.0128237
	OAS1A	3.03314	8.28786e-05
	GAS1	-0.895605	0.0333266
	MYH7	-1.22175	0.047231
	SOCS3	1.32281	0.00762407
	TNFAIP6	1.16623	0.0228892
	SIRT5	-0.547213	0.0465693
	SKIDA1	-0.737896	0.022507
	IFI205	1.55789	0.0027688
	ZFP867	-0.543179	0.0381287
	1600014C10RIK	0.626214	0.0301094
	WDR86	-1.20259	0.0377331
	IZUMO4	-0.933841	0.0464946
	SNX32	-0.683116	0.0333266
	ACBD4	-0.53995	0.0370414
	SCIMP	1.00494	0.0432497
	APOL9A	3.23185	0.0027688
	TRIM30D	1.20085	0.0366113
	ABAT	-0.769234	0.0241344
	ADAMTS17	-1.05543	0.0464946
	THRA	-0.672977	0.034337
	FCGR4	1.84934	0.0235185
	LEP	-3.45673	0.0414733
	SLC14A1	-1.71781	0.0309864
	B3GNT8	-0.563974	0.0245089
	SLX1B	-0.559087	0.0424521
	CXCL17	1.72018	0.0374973
	IRX1	1.20289	0.0413087
	RETNLA	4.13085	0.00109113
	CKS2	1.08661	0.041656
	OPCML	-1.13181	0.0455503
	IFIT3B	2.67901	0.0233122
	NRG1	0.805256	0.0325978
	WSCD2	-0.891102	0.0388221
	SOX11	-1.52472	0.0157374
	SLC24A3	-0.581884	0.0493772
	MUC5B	1.42802	0.0283342
	OAS1G	3.82691	8.28786e-05
	PPP1R3C	-0.66517	0.0436875
	TNFRSF13C	-1.46334	0.0455503
	PHF11D	1.71959	0.00838996
	APOL9B	2.56618	0.0061035
	DUSP22	-0.417168	0.0322465
	SLFN9	2.39918	0.0137623
	IL18BP	1.64228	0.00357904
	CEBPD	2.00863	0.01075
	CCNF	0.92725	0.0371166
	SLFN2	1.20464	0.00771919
	LYRM9	-0.621102	0.042125
	MUCL3	2.39057	0.0158026
	IFI204	1.90125	0.00300857
	IFI207	1.37331	0.00956072
	SPC24	1.52693	0.0077564
	MCIDAS	2.30321	0.0138728
	SIRPB1C	1.20508	0.0178099
	IFIT3	2.90895	0.00960795
	SOX4	-1.14193	0.0401958
	SLFN1	1.86295	0.0207237
	MS4A6C	1.57183	0.00701621
	KIFC1	1.21043	0.0444404
	CTSF	-0.459006	0.0483816
	CFB	1.9228	0.00763527
	PHF11B	1.41032	0.0251335
	INAFM1	-0.573861	0.0491061
	GM20683	-1.24924	0.00923313
	D430019H16RIK	-0.925912	0.022745
	SIRPB1B	1.63553	0.0493772
	ARVCF	-0.796866	0.01075
	MUC4	1.59857	0.00771919

## Sheet: S10 File, sheet F
ET26 - 4dpi - scoDEGs	HUGO ID	logFC	FDR
	DGKE	-0.66059	0.01075
Differentially expressed genes were filtered to retain only those with a single-copy human orthologue in the Ensembl database	CTTNBP2	-1.04474	0.0267188
	HAAO	-1.39166	0.0436875
	TIMP1	1.79978	0.0209306
	UHRF1	1.47905	0.01075
	UBE2C	2.18614	0.0281137
	CYP51	0.722555	0.0212816
	TUBB6	0.782125	0.0455503
	DBF4	0.693134	0.0465693
	IRF9	1.21936	0.00149755
	SEC14L2	0.793869	0.0158026
	CP	0.686506	0.0426968
	KIF20A	1.42365	0.0137623
	DNAJB11	0.512258	0.0491061
	MTHFD2	1.0383	0.0233122
	MMP8	3.84116	0.047231
	ITGAE	-0.844316	0.0191468
	GGT5	0.811222	0.0160075
	CDC20	1.03819	0.0366113
	RNF114	0.492528	0.0441627
	RBM14	0.567984	0.0328121
	PDK1	-0.605599	0.022507
	BCL2L1	0.982035	0.048796
	NUAK2	0.558776	0.0352989
	TNFRSF13B	-0.823145	0.0293826
	IFI35	0.865796	0.0188074
	KIF11	1.08077	0.0219361
	HSPA8	1.46888	0.0141348
	NFE2L2	0.588125	0.007837
	LBP	0.552358	0.0333266
	BRCA1	1.14124	0.0153927
	PSMD11	0.312392	0.047231
	BIRC5	1.56093	0.00234719
	DHX58	1.87196	0.01075
	ADORA2B	0.85429	0.0388221
	ALOX15	-2.06759	0.0432497
	DUSP6	0.712776	0.0267188
	CRY1	0.544892	0.045311
	SLC36A2	-0.697471	0.0269763
	PHYKPL	-0.62324	0.0294904
	IGFBP3	-0.722103	0.023709
	NAMPT	0.584213	0.00965305
	CMPK2	1.59226	0.0217414
	RSAD2	2.67277	0.0128237
	SLC26A4	1.31146	0.0186795
	AURKB	1.63124	0.00749776
	TOP2A	1.57009	0.01075
	ALDH6A1	-0.500111	0.0350983
	NPC2	1.17675	0.0460994
	SFTPD	1.08798	0.0450135
	GPR65	0.839836	0.0254662
	ITIH4	1.47656	0.000251644
	EPSTI1	0.988788	0.0208441
	PBK	1.55335	0.0381287
	ACOD1	3.6437	0.0416564
	PSME1	0.74733	0.034337
	GTSE1	1.54733	0.0157374
	RANGAP1	0.454597	0.0294904
	TAB1	-0.701652	0.0414733
	SEPTIN3	-1.72538	0.0216127
	APOD	3.49151	8.28786e-05
	LY6E	1.20933	0.00960795
	ADCY5	-0.576732	0.0455503
	SAMSN1	0.757156	0.0216127
	PARP9	1.03888	0.0141348
	WNT10B	-1.4365	0.0432497
	CSAD	-0.619399	0.0212816
	CDKN1A	1.82084	0.047231
	CDCA3	1.26239	0.0388221
	EIF2AK2	1.23599	0.0386959
	H2-OA	-1.14525	0.0455503
	PSAT1	0.702137	0.0403836
	IL33	1.31369	0.0176411
	STIP1	1.06447	0.0333266
	CEP55	1.61098	0.0112791
	ATP10A	0.604314	0.0300115
	IRF7	4.0954	0.000670503
	ZFP202	-0.650858	0.0388221
	ITIH5	-0.963957	0.0333266
	PDIA4	0.464131	0.0388221
	MITD1	0.817687	0.007837
	CYP27A1	-0.628515	0.0233122
	IGFBP5	-1.39734	0.0371166
	RAB17	-1.41025	0.0418294
	RALGPS2	-0.872816	0.0128237
	LCN2	2.26766	0.023669
	HSPA5	0.703692	0.0318663
	LHX6	-0.720699	0.0414733
	UBE2L6	1.35388	0.0077564
	RAD51	1.34646	0.0119027
	KNSTRN	1.10572	0.0435268
	TPX2	1.40681	0.01075
	BPIFB1	1.3566	0.0294904
	FAM210B	-0.429095	0.0328121
	AURKA	1.4103	0.0209306
	PCK1	-3.27608	0.0329789
	ZBP1	2.84283	0.0027688
	ECT2	1.60323	0.0191468
	CCNA2	1.02179	0.036791
	CCNA1	2.55062	0.0261008
	PMVK	1.25169	0.0333266
	EFNA1	-0.789747	0.0388221
	IFI44	2.67109	0.0233122
	CTSK	0.892679	0.01075
	CTPS	0.778807	0.0455503
	MFSD2A	1.58796	0.0217414
	STIL	1.36981	0.023624
	ALPL	1.36763	0.024148
	RSPO1	-0.873264	0.0112654
	CDCA8	1.44732	0.0106824
	HES2	-1.16305	0.048348
	TNFRSF9	1.58244	0.00762407
	ERRFI1	1.14497	0.0274259
	SPATA18	0.58526	0.0424521
	SLC10A6	1.05974	0.0458351
	DCK	1.08146	0.0235185
	AREG	1.78843	0.00979841
	HERC6	1.33511	0.0388221
	CLEC5A	1.09399	0.0333266
	PIANP	-1.67053	0.0413334
	PLIN1	-2.60635	0.0493772
	CD22	-1.48259	0.0388221
	SYTL2	-0.525051	0.0236656
	PLK1	1.28431	0.0119747
	GP2	2.82619	0.0124906
	WEE1	0.656297	0.0233258
	TSC22D3	1.76148	0.00923313
	F10	1.22466	0.0421563
	ADRB3	-1.24717	0.0243477
	IFI30	0.813547	0.0163025
	ST14	0.480713	0.0481564
	SESN3	-0.52316	0.0465693
	CHEK1	0.964595	0.0274259
	CCNB2	1.50697	0.00701621
	KIF23	1.10582	0.0458801
	NRG4	-0.967065	0.0347997
	FAM83B	1.00441	0.0436875
	PTGS2	1.10298	0.0413334
	MYD88	0.691651	0.0147592
	CSRNP1	1.35251	0.0077564
	PCCB	-0.522076	0.0421563
	OAS3	3.3728	0.0056195
	OAS2	2.25593	0.00614654
	TROAP	2.21077	0.00771919
	RTP4	2.19596	0.00255355
	UCP2	0.835473	0.0186125
	NRXN2	-0.78425	0.00960795
	LGALS3BP	2.30096	0.00109113
	ASPM	1.28756	0.0309674
	ZBED4	0.54606	0.0121309
	TENT4A	0.569698	0.0455503
	RUBCNL	-1.04749	0.0436875
	FAM167A	1.05061	0.0212816
	CCL7	2.54587	0.0233122
	CCL2	1.89211	0.0186125
	CRB2	-2.17842	0.0359903
	TGFBI	0.959059	0.00357904
	TDRD7	0.610821	0.0293826
	MELK	1.37246	0.007837
	THRSP	-2.58927	0.047231
	ISG15	4.22966	0.000458104
	MISP	1.35173	0.00407648
	GRAMD4	-0.619132	0.0455503
	ALDH5A1	-0.918137	0.01075
	GLB1L2	-0.73441	0.0113256
	ANLN	0.92029	0.0216504
	C1QA	1.21291	0.0261008
	C1QC	1.11154	0.0294904
	PIWIL4	1.14189	0.0318111
	LRG1	1.8194	0.0328121
	SERPINE1	1.00552	0.0427971
	DTL	1.34768	0.0322985
	DLGAP5	1.5673	0.01075
	ABHD18	-0.983197	0.0481564
	DDX60	1.502	0.0455503
	MUC5AC	1.26875	0.041656
	FKBP14	0.667317	0.0436875
	CDON	-0.608491	0.0317071
	MYLIP	-0.729194	0.0280568
	SESN1	-0.378563	0.0317286
	CTSS	1.08278	0.0121309
	SEMA6C	-1.16306	0.0495663
	PRC1	1.10678	0.0200771
	ISG20	1.30008	0.0300115
	LAP3	0.760844	0.0233122
	KMO	-0.892677	0.0384453
	ENDOV	-0.626078	0.0455503
	SPSB1	0.780116	0.047231
	DEUP1	1.40966	0.0427971
	MAGI2	-0.892529	0.036425
	PCLAF	1.41004	0.0114026
	TBC1D10C	-0.914988	0.0327801
	XAF1	1.78381	0.0027688
	METTL27	-0.8783	0.0197461
	CD79B	-1.08361	0.0467128
	EFHD2	0.39152	0.0430829
	CLCF1	-1.20005	0.0388221
	HLCS	-0.711016	0.0251335
	CCR6	-1.95406	0.0233122
	BDKRB1	1.31474	0.0173367
	CCNB1	1.89041	0.0120002
	H2-OB	-1.32451	0.0388221
	PNPLA3	-3.18984	0.0182383
	TMEM45B	-2.44373	0.0462886
	OASL1	2.80475	0.00333352
	TREM1	2.1831	0.0294108
	CCNO	1.97184	0.007837
	AA986860	1.21322	0.00547346
	MAFF	1.19234	0.01075
	MUC1	0.596822	0.047231
	EXOG	0.640425	0.0441627
	TUBA1C	0.950067	0.0238445
	HIC1	-0.921508	0.0329862
	A530016L24RIK	-2.90974	0.0350983
	HEPACAM2	-0.712104	0.047231
	CIRBP	-1.24985	0.00960795
	BST2	1.95989	0.00118884
	KCTD11	0.400924	0.0243477
	PTGS1	0.670168	0.0414733
	PALM3	-1.80801	0.0352704
	CKAP2L	1.61079	0.022507
	CDCA2	1.38016	0.0178099
	FUT4	0.768279	0.0238636
	KRT8	0.746121	0.0396563
	OGFR	0.677409	0.00749776
	TREX1	1.22693	0.0128237
	SLC35C1	0.435463	0.0200419
	H2AX	0.862461	0.0269763
	CH25H	1.5174	0.00749776
	CD14	1.19454	0.0432497
	BTLA	-1.36716	0.0281684
	CD177	1.81336	0.0128237
	GAS1	-0.895605	0.0333266
	MYH7	-1.22175	0.047231
	SOCS3	1.32281	0.00762407
	TNFAIP6	1.16623	0.0228892
	SIRT5	-0.547213	0.0465693
	SKIDA1	-0.737896	0.022507
	1600014C10RIK	0.626214	0.0301094
	WDR86	-1.20259	0.0377331
	IZUMO4	-0.933841	0.0464946
	SNX32	-0.683116	0.0333266
	ACBD4	-0.53995	0.0370414
	SCIMP	1.00494	0.0432497
	ABAT	-0.769234	0.0241344
	ADAMTS17	-1.05543	0.0464946
	THRA	-0.672977	0.034337
	LEP	-3.45673	0.0414733
	SLC14A1	-1.71781	0.0309864
	B3GNT8	-0.563974	0.0245089
	CXCL17	1.72018	0.0374973
	IRX1	1.20289	0.0413087
	CKS2	1.08661	0.041656
	OPCML	-1.13181	0.0455503
	WSCD2	-0.891102	0.0388221
	SOX11	-1.52472	0.0157374
	SLC24A3	-0.581884	0.0493772
	MUC5B	1.42802	0.0283342
	PPP1R3C	-0.66517	0.0436875
	TNFRSF13C	-1.46334	0.0455503
	DUSP22	-0.417168	0.0322465
	IL18BP	1.64228	0.00357904
	CEBPD	2.00863	0.01075
	CCNF	0.92725	0.0371166
	LYRM9	-0.621102	0.042125
	MUCL3	2.39057	0.0158026
	SPC24	1.52693	0.0077564
	MCIDAS	2.30321	0.0138728
	SOX4	-1.14193	0.0401958
	CTSF	-0.459006	0.0483816
	INAFM1	-0.573861	0.0491061
	D430019H16RIK	-0.925912	0.022745
	ARVCF	-0.796866	0.01075
	MUC4	1.59857	0.00771919

## Sheet: S10 File, sheet G
ET26 - 6dpi - DEGs	ENSEMBL ID	HUGO ID	logFC	logCPM	F	PValue	FDR	Grp3Ms1day6	Grp3Ms2day6	Grp3Ms3day6	Grp3Ms4day6	Ms1naive	Ms2naive	Ms3naive
	ENSMUSG00000001228.15	Uhrf1	1.59801	3.23565	33.5935	2.48327e-05	0.0140071	350	247	278	175	108	100	98
Differentially expressed genes (EdgeR, FDR<0.05) from lungs of mACE2-hACE2 C57BL/6J mice 6 days after infection with SARS-CoV-2 compared to control group	ENSMUSG00000001403.14	Ube2c	2.47162	2.61946	25.3104	0.000114458	0.0280057	167	248	190	110	24	46	43
	ENSMUSG00000001444.3	Tbx21	1.34765	1.55155	22.2401	0.000219025	0.0419987	132	82	104	78	39	33	65
	ENSMUSG00000002055.10	Spag5	1.56965	1.95586	20.7788	0.000304145	0.0497261	166	98	134	72	43	56	40
	ENSMUSG00000002297.17	Dbf4	0.974729	2.90799	30.5733	4.19512e-05	0.0175883	196	138	202	137	113	96	97
	ENSMUSG00000003779.17	Kif20a	1.5815	2.52628	32.456	3.01351e-05	0.015602	204	101	239	107	60	65	67
	ENSMUSG00000004612.10	Nkg7	1.86912	3.4708	25.9305	0.000101016	0.0280057	483	280	641	252	94	122	181
	ENSMUSG00000005470.9	Asf1b	1.4133	2.37507	27.4619	7.47941e-05	0.0238865	176	119	214	88	77	55	66
	ENSMUSG00000006310.11	Zbtb32	1.44403	1.85158	26.7711	8.55342e-05	0.0255484	131	102	123	89	49	64	33
	ENSMUSG00000009185.3	Ccl8	2.01089	3.029	20.8176	0.000301448	0.0497261	334	89	352	117	52	73	68
	ENSMUSG00000011171.12	Vipr2	-1.12813	4.1747	43.0769	5.79109e-06	0.00749855	304	266	194	133	681	524	522
	ENSMUSG00000012443.5	Kif11	1.42562	2.75651	38.0619	1.21055e-05	0.00913256	261	165	219	144	76	85	98
	ENSMUSG00000015437.6	Gzmb	2.65143	3.02101	30.0476	4.61252e-05	0.0175883	488	300	599	210	32	46	141
	ENSMUSG00000015880.14	Ncapg	1.69671	1.47028	22.9782	0.00018648	0.0380685	133	74	86	50	32	17	43
	ENSMUSG00000015968.19	Cacna1d	-0.839401	5.19948	21.8983	0.000236221	0.0431645	690	508	475	423	1387	1014	949
	ENSMUSG00000017146.13	Brca1	1.13318	1.42506	25.2686	0.000115437	0.0280057	67	54	76	55	42	25	36
	ENSMUSG00000017499.16	Cdc6	1.27696	1.7432	24.3273	0.000140102	0.0315852	119	79	85	64	47	48	32
	ENSMUSG00000017716.16	Birc5	2.19897	2.50968	98.136	2.50333e-08	0.000388817	220	139	256	166	56	40	56
	ENSMUSG00000019942.14	Cdk1	1.73992	2.81858	30.0544	4.60684e-05	0.0175883	220	96	304	151	60	59	86
	ENSMUSG00000020038.11	Cry1	0.665804	3.75165	23.7998	0.000156487	0.0337577	232	255	206	222	169	157	192
	ENSMUSG00000020427.12	Igfbp3	-0.793786	6.53194	25.8409	0.000102844	0.0280057	1810	1627	1117	815	2614	2785	2754
	ENSMUSG00000020649.12	Rrm2	1.80148	3.04864	38.2695	1.17255e-05	0.00913256	400	227	349	174	82	79	127
	ENSMUSG00000020897.13	Aurkb	1.7931	1.88463	42.1004	6.65087e-06	0.00794626	163	79	109	69	33	33	40
	ENSMUSG00000020914.18	Top2a	1.6937	4.08314	33.4635	2.5382e-05	0.0140071	771	402	557	269	171	167	200
	ENSMUSG00000021485.15	Mxd3	1.57214	0.890182	23.5888	0.000163635	0.0343456	74	31	77	44	15	26	26
	ENSMUSG00000022322.9	Shcbp1	1.88723	0.777718	25.4341	0.000111624	0.0280057	83	42	61	28	8	26	16
	ENSMUSG00000022385.12	Gtse1	1.50975	1.22714	24.251	0.000142349	0.0315852	80	57	58	36	26	15	30
	ENSMUSG00000022548.15	Apod	1.46501	5.55583	21.748	0.000244265	0.043755	793	679	808	214	361	256	174
	ENSMUSG00000022586.12	Ly6i	1.76975	3.33502	21.7329	0.000245086	0.043755	146	72	146	81	35	28	52
	ENSMUSG00000023015.15	Racgap1	1.18665	3.38352	25.952	0.000100582	0.0280057	392	214	343	202	122	156	167
	ENSMUSG00000023505.14	Cdca3	1.59115	2.54886	27.1795	7.89897e-05	0.0245374	219	108	259	109	66	55	82
	ENSMUSG00000023828.4	Slc22a3	-0.907466	2.49154	25.5373	0.00010932	0.0280057	89	88	81	45	159	206	137
	ENSMUSG00000024028.8	Tff2	2.14064	3.17789	28.5822	6.04453e-05	0.0213372	267	133	262	348	63	97	51
	ENSMUSG00000024791.11	Cdca5	1.48906	1.01896	22.8027	0.000193692	0.0380813	76	39	73	44	22	24	27
	ENSMUSG00000024989.16	Cep55	1.55006	1.35249	26.4456	9.11878e-05	0.0267232	94	46	93	36	20	30	30
	ENSMUSG00000025511.16	Tspan4	1.01355	6.46822	37.9333	1.23476e-05	0.00913256	1856	1917	2018	1160	901	1127	1015
	ENSMUSG00000026285.9	Pdcd1	2.34581	0.278391	27.6357	7.23361e-05	0.0238865	38	35	38	23	5	11	7
	ENSMUSG00000026971.16	Itgb6	-0.868266	5.47004	26.885	8.36489e-05	0.0254752	744	636	786	376	1440	1291	1361
	ENSMUSG00000027227.8	Sord	0.763979	6.46485	25.3616	0.000113277	0.0280057	1771	1986	1831	1821	1427	1397	1125
	ENSMUSG00000027306.16	Nusap1	1.39423	2.44219	29.4379	5.15604e-05	0.0190675	180	127	210	98	69	48	89
	ENSMUSG00000027323.11	Rad51	1.582	1.68633	38.188	1.18731e-05	0.00913256	114	80	88	82	30	36	42
	ENSMUSG00000027469.17	Tpx2	1.42159	2.60796	30.0115	4.6428e-05	0.0175883	222	114	208	98	75	69	67
	ENSMUSG00000027715.10	Ccna2	1.51127	3.0792	38.2222	1.1811e-05	0.00913256	321	201	356	159	108	84	128
	ENSMUSG00000027793.7	Ccna1	3.29663	0.448345	34.2507	2.22516e-05	0.0140071	79	18	72	26	5	6	6
	ENSMUSG00000028111.5	Ctsk	0.806257	5.0055	24.2517	0.000142326	0.0315852	617	556	792	687	449	465	460
	ENSMUSG00000028718.17	Stil	1.73967	1.40813	34.1449	2.26461e-05	0.0140071	111	45	96	57	35	21	26
	ENSMUSG00000028873.17	Cdca8	1.76244	1.95176	43.5995	5.38269e-06	0.00749855	159	70	158	83	34	43	45
	ENSMUSG00000028965.14	Tnfrsf9	1.4816	0.610769	30.3538	4.36401e-05	0.0175883	43	28	39	37	14	15	18
	ENSMUSG00000029155.17	Spata18	0.677631	3.96787	22.1763	0.000222126	0.042074	338	264	286	265	255	191	202
	ENSMUSG00000029334.15	Prkg2	-0.765124	4.67291	27.423	7.53567e-05	0.0238865	398	306	362	221	713	603	623
	ENSMUSG00000029417.10	Cxcl9	3.80083	2.56684	23.7023	0.000159744	0.0339883	559	123	510	56	23	24	29
	ENSMUSG00000029910.15	Mad2l1	0.758748	3.13023	21.2565	0.000272783	0.0461363	239	165	258	168	161	124	153
	ENSMUSG00000030167.16	Klrc1	2.20511	0.667546	33.4389	2.54874e-05	0.0140071	92	57	77	24	20	14	13
	ENSMUSG00000030677.9	Kif22	1.1789	2.18128	22.0885	0.000226472	0.0423804	185	105	144	90	81	69	55
	ENSMUSG00000030742.8	Lat	0.940717	3.1211	25.194	0.000117201	0.0280057	306	229	282	258	153	165	184
	ENSMUSG00000030867.8	Plk1	1.66288	2.07105	45.9037	3.92892e-06	0.00749855	168	124	146	89	59	34	54
	ENSMUSG00000030954.12	Gp2	3.21594	0.757273	35.1889	1.90728e-05	0.01288	85	57	43	30	10	7	3
	ENSMUSG00000031004.9	Mki67	1.57454	4.52269	26.1512	9.66662e-05	0.0278041	1002	552	716	584	254	243	350
	ENSMUSG00000031016.10	Wee1	0.801066	4.25747	31.9814	3.27148e-05	0.0159287	378	428	358	277	226	262	247
	ENSMUSG00000032011.6	Thy1	1.24634	4.82203	43.8432	5.20339e-06	0.00749855	1016	765	1125	815	438	517	450
	ENSMUSG00000032024.11	Clmp	-0.960527	3.45181	30.4267	4.30707e-05	0.0175883	179	153	169	90	337	362	316
	ENSMUSG00000032218.8	Ccnb2	1.92186	2.42225	57.3832	9.59726e-07	0.00456063	181	130	245	99	41	54	57
	ENSMUSG00000032245.13	Cln6	0.502827	5.20666	21.3247	0.000268614	0.0461363	837	834	873	743	783	706	601
	ENSMUSG00000032783.10	Troap	1.9914	0.310871	27.6306	7.24069e-05	0.0238865	45	18	39	21	9	7	11
	ENSMUSG00000033952.15	Aspm	1.45625	1.42753	24.6786	0.000130263	0.0301977	105	61	79	47	25	31	37
	ENSMUSG00000035455.13	Fignl1	1.37633	1.61125	21.1577	0.00027896	0.0465893	116	64	110	50	40	36	39
	ENSMUSG00000035683.14	Melk	1.38268	1.23454	33.2864	2.61529e-05	0.0140071	79	47	66	50	22	26	34
	ENSMUSG00000035891.17	Cerk	-0.502193	5.9363	21.2485	0.000273277	0.0461363	1069	1011	818	628	1552	1496	1377
	ENSMUSG00000037313.17	Tacc3	0.959444	2.82484	31.8377	3.35437e-05	0.0159287	232	143	200	161	130	105	104
	ENSMUSG00000037379.8	Spon2	-1.69413	3.74754	39.783	9.32792e-06	0.00913256	185	125	207	63	638	514	496
	ENSMUSG00000037544.15	Dlgap5	1.9254	1.38035	43.7027	5.30599e-06	0.00749855	129	70	79	47	17	24	33
	ENSMUSG00000039977.17	Deup1	1.68755	2.78562	23.3146	0.00017348	0.0359266	204	78	223	230	66	63	79
	ENSMUSG00000040204.7	Pclaf	2.18679	2.34617	65.5018	4.02995e-07	0.00312966	262	162	224	106	55	37	53
	ENSMUSG00000040675.18	Mthfd1l	1.25151	3.29424	39.1699	1.02258e-05	0.00913256	230	240	184	242	105	124	111
	ENSMUSG00000041431.17	Ccnb1	2.21712	2.14359	37.5788	1.30442e-05	0.00920924	210	104	208	52	44	23	40
	ENSMUSG00000042417.6	Ccno	1.71787	2.71588	25.5708	0.000108584	0.0280057	172	57	187	192	61	51	57
	ENSMUSG00000042487.7	Leo1	-1.04791	3.35273	54.2734	1.37344e-06	0.00456063	131	128	137	101	343	282	295
	ENSMUSG00000045328.12	Cenpe	1.39503	1.80758	21.4539	0.000260904	0.0460496	148	78	105	75	41	48	47
	ENSMUSG00000049932.4	H2ax	0.96795	4.19057	25.5602	0.000108815	0.0280057	492	319	512	319	237	245	264
	ENSMUSG00000050232.7	Cxcr3	1.60356	2.12585	22.8631	0.000191176	0.0380685	250	165	145	104	74	63	55
	ENSMUSG00000053044.9	Cd8b1	1.95438	3.03072	28.7999	5.80327e-05	0.020962	445	338	434	224	71	121	133
	ENSMUSG00000054717.8	Hmgb2	1.10867	5.52489	43.0741	5.79337e-06	0.00749855	1450	978	1557	994	775	586	701
	ENSMUSG00000055116.9	Arntl	-2.00869	3.02762	45.8544	3.95499e-06	0.00749855	96	60	100	54	503	283	329
	ENSMUSG00000055541.19	Lair1	0.776289	3.55295	27.6095	7.27008e-05	0.0238865	309	240	290	208	160	167	215
	ENSMUSG00000061100.6	Retnla	2.77516	7.41073	31.1353	3.79524e-05	0.0173376	3387	1556	5457	1726	618	522	433
	ENSMUSG00000062248.6	Cks2	1.22819	2.29523	21.3216	0.000268798	0.0461363	127	82	145	99	58	55	60
	ENSMUSG00000068227.10	Il2rb	1.18903	4.45834	21.953	0.000233369	0.0431511	910	676	753	430	289	336	437
	ENSMUSG00000072082.8	Ccnf	1.22831	1.95664	30.9137	3.94763e-05	0.0175184	133	96	127	73	57	54	51
	ENSMUSG00000074476.7	Spc24	1.48716	1.93703	31.7869	3.38427e-05	0.0159287	98	69	117	92	48	32	41
	ENSMUSG00000076498.3	Trbc2	1.57221	3.38698	22.9197	0.000188849	0.0380685	435	241	480	416	155	156	167
	ENSMUSG00000079553.12	Kifc1	1.47849	1.85285	23.8109	0.000156119	0.0337577	125	68	120	83	33	45	48
	ENSMUSG00000106957.2	Gm43085	-0.677766	7.01579	22.6619	0.000199711	0.0387739	2256	2181	2348	1206	4275	3716	3317
	ENSMUSG00000109904.2	Gm45819	1.47546	2.06166	38.097	1.20402e-05	0.00913256	93	107	70	77	35	30	46
	ENSMUSG00000110945.2	Gm9856	-0.761768	2.87825	24.7739	0.000127729	0.0300588	141	121	97	92	242	213	226
	ENSMUSG00000112808.2	Gm4739	1.4093	3.60444	53.7098	1.46814e-06	0.00456063	393	261	396	304	163	138	156

## Sheet: S10 File, sheet H
ET26 - 6dpi - orthoDEGs	HUGO ID	logFC	FDR
	UHRF1	1.59801	0.0140071
Differentially expressed genes were filtered to retain only those with a human orthologue in the Ensembl database	UBE2C	2.47162	0.0280057
	TBX21	1.34765	0.0419987
	SPAG5	1.56965	0.0497261
	DBF4	0.974729	0.0175883
	KIF20A	1.5815	0.015602
	NKG7	1.86912	0.0280057
	ASF1B	1.4133	0.0238865
	ZBTB32	1.44403	0.0255484
	CCL8	2.01089	0.0497261
	VIPR2	-1.12813	0.00749855
	KIF11	1.42562	0.00913256
	GZMB	2.65143	0.0175883
	NCAPG	1.69671	0.0380685
	CACNA1D	-0.839401	0.0431645
	BRCA1	1.13318	0.0280057
	CDC6	1.27696	0.0315852
	BIRC5	2.19897	0.000388817
	CRY1	0.665804	0.0337577
	IGFBP3	-0.793786	0.0280057
	RRM2	1.80148	0.00913256
	AURKB	1.7931	0.00794626
	TOP2A	1.6937	0.0140071
	MXD3	1.57214	0.0343456
	SHCBP1	1.88723	0.0280057
	GTSE1	1.50975	0.0315852
	APOD	1.46501	0.043755
	RACGAP1	1.18665	0.0280057
	CDCA3	1.59115	0.0245374
	SLC22A3	-0.907466	0.0280057
	TFF2	2.14064	0.0213372
	CDCA5	1.48906	0.0380813
	CEP55	1.55006	0.0267232
	TSPAN4	1.01355	0.00913256
	PDCD1	2.34581	0.0238865
	ITGB6	-0.868266	0.0254752
	SORD	0.763979	0.0280057
	NUSAP1	1.39423	0.0190675
	RAD51	1.582	0.00913256
	TPX2	1.42159	0.0175883
	CCNA2	1.51127	0.00913256
	CCNA1	3.29663	0.0140071
	CTSK	0.806257	0.0315852
	STIL	1.73967	0.0140071
	CDCA8	1.76244	0.00749855
	TNFRSF9	1.4816	0.0175883
	SPATA18	0.677631	0.042074
	PRKG2	-0.765124	0.0238865
	CXCL9	3.80083	0.0339883
	MAD2L1	0.758748	0.0461363
	KLRC1	2.20511	0.0140071
	KIF22	1.1789	0.0423804
	LAT	0.940717	0.0280057
	PLK1	1.66288	0.00749855
	GP2	3.21594	0.01288
	MKI67	1.57454	0.0278041
	WEE1	0.801066	0.0159287
	THY1	1.24634	0.00749855
	CLMP	-0.960527	0.0175883
	CCNB2	1.92186	0.00456063
	CLN6	0.502827	0.0461363
	TROAP	1.9914	0.0238865
	ASPM	1.45625	0.0301977
	FIGNL1	1.37633	0.0465893
	MELK	1.38268	0.0140071
	CERK	-0.502193	0.0461363
	TACC3	0.959444	0.0159287
	SPON2	-1.69413	0.00913256
	DLGAP5	1.9254	0.00749855
	DEUP1	1.68755	0.0359266
	PCLAF	2.18679	0.00312966
	MTHFD1L	1.25151	0.00913256
	CCNB1	2.21712	0.00920924
	CCNO	1.71787	0.0280057
	LEO1	-1.04791	0.00456063
	CENPE	1.39503	0.0460496
	H2AX	0.96795	0.0280057
	CXCR3	1.60356	0.0380685
	CD8B1	1.95438	0.020962
	HMGB2	1.10867	0.00749855
	ARNTL	-2.00869	0.00749855
	RETNLA	2.77516	0.0173376
	CKS2	1.22819	0.0461363
	IL2RB	1.18903	0.0431511
	CCNF	1.22831	0.0175184
	SPC24	1.48716	0.0159287
	TRBC2	1.57221	0.0380685
	KIFC1	1.47849	0.0337577

## Sheet: S10 File, sheet I
ET26 - 6dpi - scoDEGs	HUGO ID	logFC	FDR
	UHRF1	1.59801	0.0140071
Differentially expressed genes were filtered to retain only those with a single-copy human orthologue in the Ensembl database	UBE2C	2.47162	0.0280057
	TBX21	1.34765	0.0419987
	SPAG5	1.56965	0.0497261
	DBF4	0.974729	0.0175883
	KIF20A	1.5815	0.015602
	NKG7	1.86912	0.0280057
	ASF1B	1.4133	0.0238865
	ZBTB32	1.44403	0.0255484
	VIPR2	-1.12813	0.00749855
	KIF11	1.42562	0.00913256
	NCAPG	1.69671	0.0380685
	CACNA1D	-0.839401	0.0431645
	BRCA1	1.13318	0.0280057
	CDC6	1.27696	0.0315852
	BIRC5	2.19897	0.000388817
	CRY1	0.665804	0.0337577
	IGFBP3	-0.793786	0.0280057
	RRM2	1.80148	0.00913256
	AURKB	1.7931	0.00794626
	TOP2A	1.6937	0.0140071
	MXD3	1.57214	0.0343456
	SHCBP1	1.88723	0.0280057
	GTSE1	1.50975	0.0315852
	APOD	1.46501	0.043755
	RACGAP1	1.18665	0.0280057
	CDCA3	1.59115	0.0245374
	SLC22A3	-0.907466	0.0280057
	TFF2	2.14064	0.0213372
	CDCA5	1.48906	0.0380813
	CEP55	1.55006	0.0267232
	TSPAN4	1.01355	0.00913256
	PDCD1	2.34581	0.0238865
	ITGB6	-0.868266	0.0254752
	SORD	0.763979	0.0280057
	NUSAP1	1.39423	0.0190675
	RAD51	1.582	0.00913256
	TPX2	1.42159	0.0175883
	CCNA2	1.51127	0.00913256
	CCNA1	3.29663	0.0140071
	CTSK	0.806257	0.0315852
	STIL	1.73967	0.0140071
	CDCA8	1.76244	0.00749855
	TNFRSF9	1.4816	0.0175883
	SPATA18	0.677631	0.042074
	PRKG2	-0.765124	0.0238865
	CXCL9	3.80083	0.0339883
	MAD2L1	0.758748	0.0461363
	KIF22	1.1789	0.0423804
	LAT	0.940717	0.0280057
	PLK1	1.66288	0.00749855
	GP2	3.21594	0.01288
	MKI67	1.57454	0.0278041
	WEE1	0.801066	0.0159287
	THY1	1.24634	0.00749855
	CLMP	-0.960527	0.0175883
	CCNB2	1.92186	0.00456063
	CLN6	0.502827	0.0461363
	TROAP	1.9914	0.0238865
	ASPM	1.45625	0.0301977
	FIGNL1	1.37633	0.0465893
	MELK	1.38268	0.0140071
	CERK	-0.502193	0.0461363
	TACC3	0.959444	0.0159287
	SPON2	-1.69413	0.00913256
	DLGAP5	1.9254	0.00749855
	DEUP1	1.68755	0.0359266
	PCLAF	2.18679	0.00312966
	MTHFD1L	1.25151	0.00913256
	CCNB1	2.21712	0.00920924
	CCNO	1.71787	0.0280057
	LEO1	-1.04791	0.00456063
	CENPE	1.39503	0.0460496
	H2AX	0.96795	0.0280057
	CXCR3	1.60356	0.0380685
	HMGB2	1.10867	0.00749855
	ARNTL	-2.00869	0.00749855
	CKS2	1.22819	0.0461363
	IL2RB	1.18903	0.0431511
	CCNF	1.22831	0.0175184
	SPC24	1.48716	0.0159287

## Sheet: S10 File, sheet J
ET26 - 10dpi - DEGs	ENSEMBL ID	HUGO ID	logFC	logCPM	F	PValue	FDR	Grp4Ms1day10	Grp4Ms3day10	Grp4Ms4day10	Ms1naive	Ms2naive	Ms3naive
	ENSMUSG00000020038.11	Cry1	0.875736	3.75165	36.8237	1.46798e-05	0.0380012	315	294	278	169	157	192
Differentially expressed genes (EdgeR, FDR<0.05) from lungs of mACE2-hACE2 C57BL/6J mice 10 days after infection with SARS-CoV-2 compared to control group	ENSMUSG00000025511.16	Tspan4	1.07852	6.46822	38.7215	1.09439e-05	0.0380012	2289	2131	1628	901	1127	1015
	ENSMUSG00000028967.11	Errfi1	1.5819	7.8347	34.4277	2.16089e-05	0.0419537	6986	5545	8133	2300	2454	2748
	ENSMUSG00000031016.10	Wee1	0.915631	4.25747	37.476	1.32545e-05	0.0380012	391	435	455	226	262	247
	ENSMUSG00000031431.14	Tsc22d3	1.89671	8.39542	33.2923	2.61266e-05	0.0450887	7690	10724	9538	1977	2832	3269
	ENSMUSG00000032515.9	Csrnp1	1.61623	5.82759	43.2198	5.67607e-06	0.0380012	1258	1709	1806	445	580	664
	ENSMUSG00000042487.7	Leo1	-0.903491	3.35273	34.5998	2.1004e-05	0.0419537	179	166	117	343	282	295
	ENSMUSG00000055116.9	Arntl	-2.38569	3.02762	51.6764	1.8761e-06	0.0291396	78	85	38	503	283	329
	ENSMUSG00000109904.2	Gm45819	1.57523	2.06166	39.6901	9.45805e-06	0.0380012	103	99	106	35	30	46

[truncated: 2 more sheets: S10 File, sheet K, S10 File, sheet L]
